# Supplementary material for: The synthesis of fused and spiro annulated carbohydrate structures using copper(i) catalysed intramolecular photoannulation of glucose derivativesElectronic supplementary information (ESI) available: NMR data and ORTEP diagrams. See http://www.rsc.org/suppdata/ob/b3/b315623k/
Source: Royal Society of Chemistry journal article supplement (doi:10.1039/b315623k), 2004-01-01
Supplement: b315623k.pdf [file b315623k.pdf]

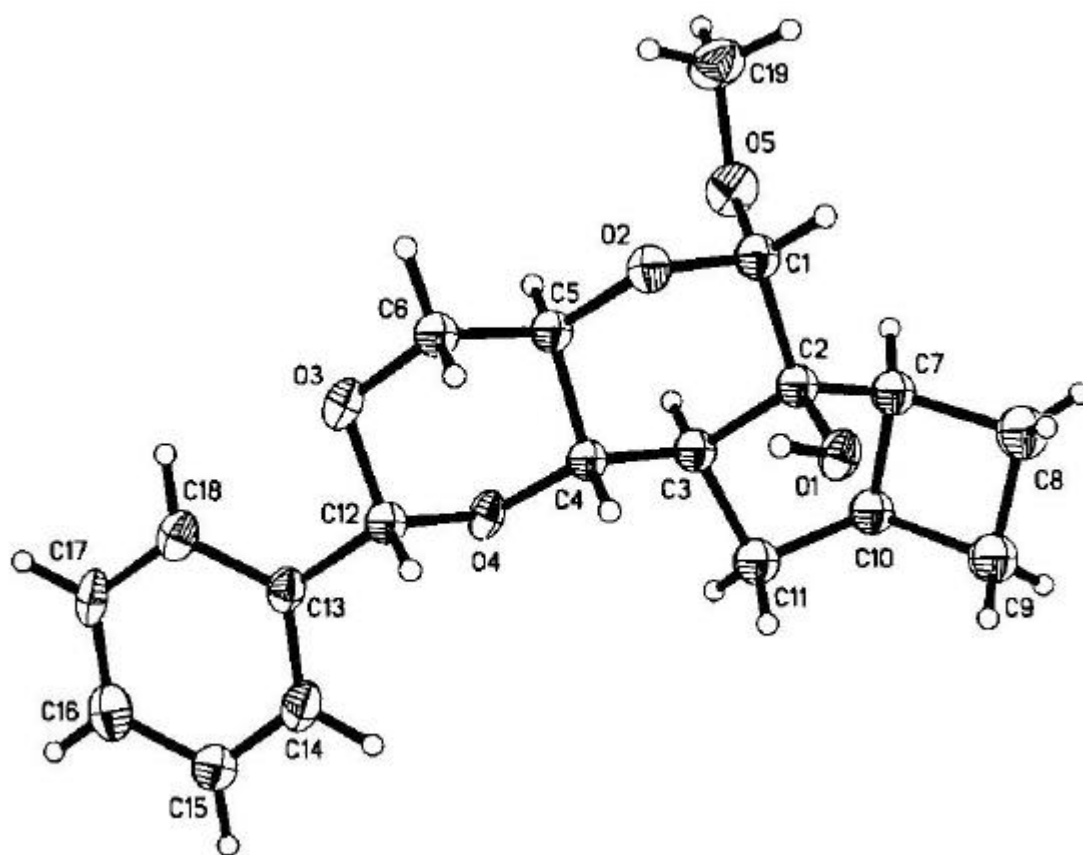

**3a** X-ray crystal structure – for full details see Ref. 15.



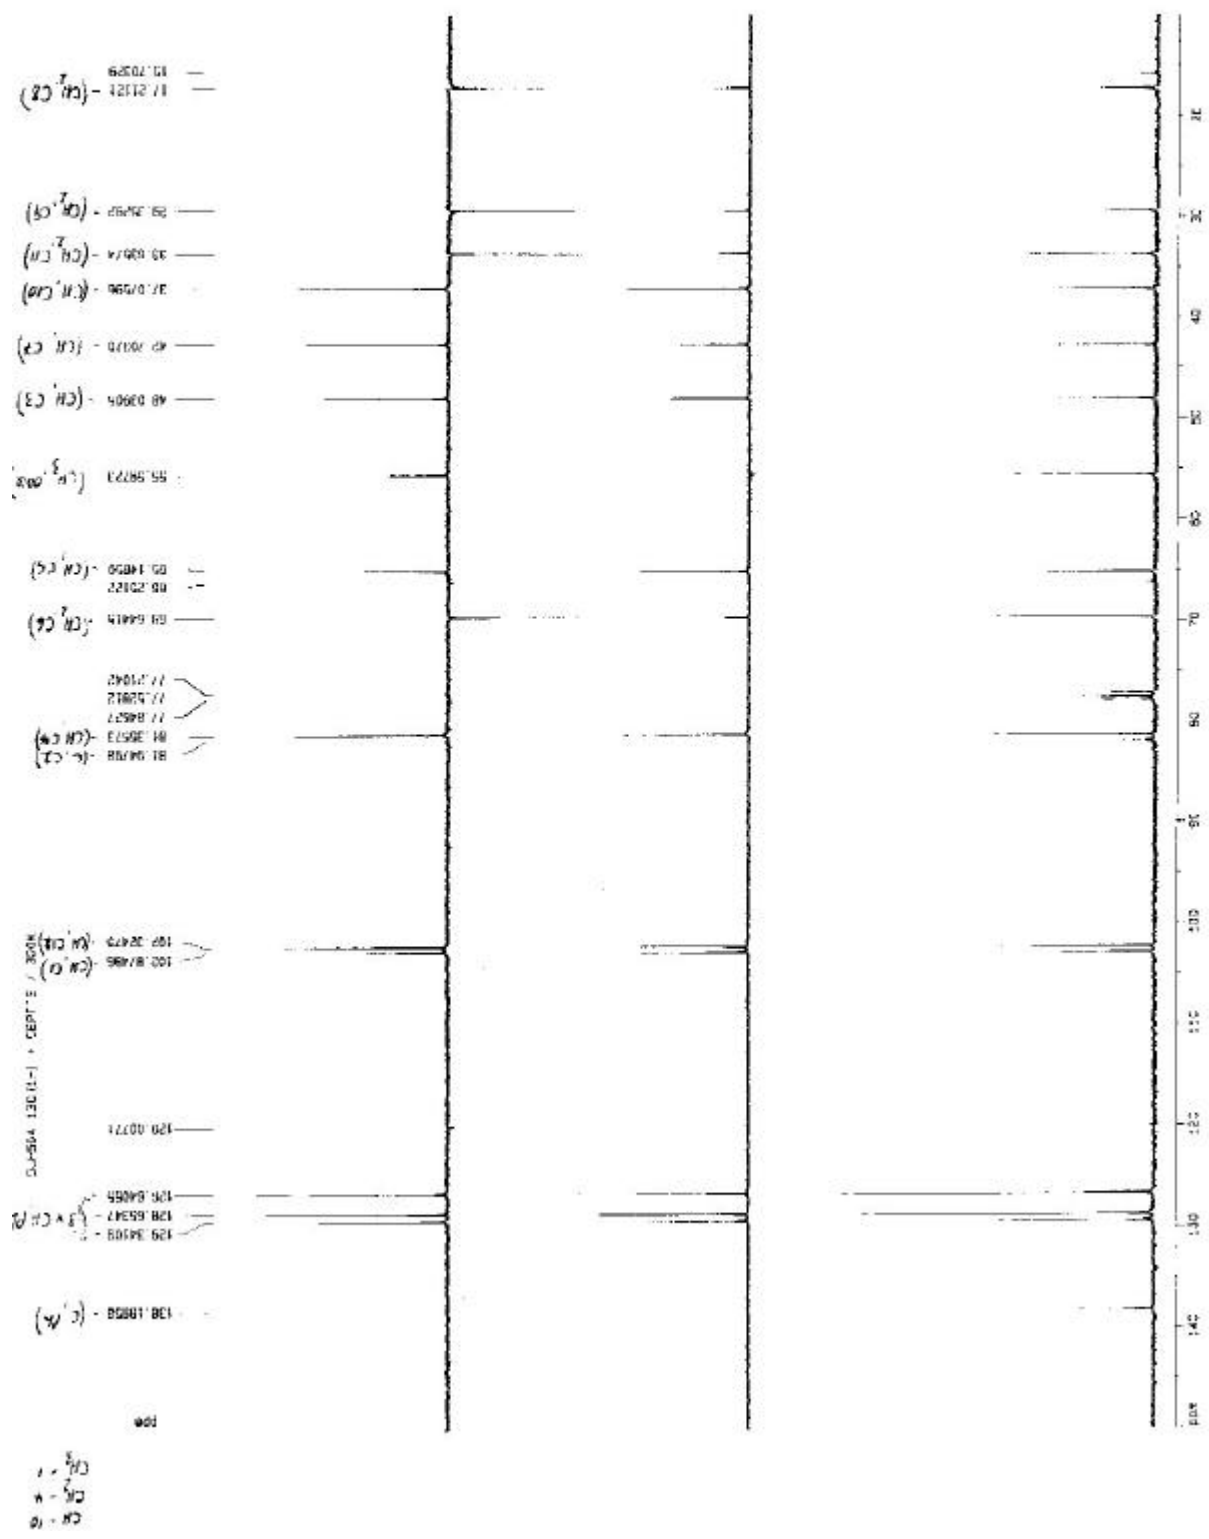

13C NMR Data Parameters  
 Name: 3a  
 Date: 11/11/04  
 Time: 11:55  
 Solvent: CDCl3  
 P1: 12.00  
 F1: 125.76  
 SFO: 101.325  
 A1: 1.00  
 G1: 1.00  
 G2: 1.00  
 G3: 1.00  
 G4: 1.00  
 G5: 1.00  
 G6: 1.00  
 G7: 1.00  
 G8: 1.00  
 G9: 1.00  
 G10: 1.00  
 G11: 1.00  
 G12: 1.00  
 G13: 1.00  
 G14: 1.00  
 G15: 1.00  
 G16: 1.00  
 G17: 1.00  
 G18: 1.00  
 G19: 1.00  
 G20: 1.00  
 G21: 1.00  
 G22: 1.00  
 G23: 1.00  
 G24: 1.00  
 G25: 1.00  
 G26: 1.00  
 G27: 1.00  
 G28: 1.00  
 G29: 1.00  
 G30: 1.00  
 G31: 1.00  
 G32: 1.00  
 G33: 1.00  
 G34: 1.00  
 G35: 1.00  
 G36: 1.00  
 G37: 1.00  
 G38: 1.00  
 G39: 1.00  
 G40: 1.00  
 G41: 1.00  
 G42: 1.00  
 G43: 1.00  
 G44: 1.00  
 G45: 1.00  
 G46: 1.00  
 G47: 1.00  
 G48: 1.00  
 G49: 1.00  
 G50: 1.00  
 G51: 1.00  
 G52: 1.00  
 G53: 1.00  
 G54: 1.00  
 G55: 1.00  
 G56: 1.00  
 G57: 1.00  
 G58: 1.00  
 G59: 1.00  
 G60: 1.00  
 G61: 1.00  
 G62: 1.00  
 G63: 1.00  
 G64: 1.00  
 G65: 1.00  
 G66: 1.00  
 G67: 1.00  
 G68: 1.00  
 G69: 1.00  
 G70: 1.00  
 G71: 1.00  
 G72: 1.00  
 G73: 1.00  
 G74: 1.00  
 G75: 1.00  
 G76: 1.00  
 G77: 1.00  
 G78: 1.00  
 G79: 1.00  
 G80: 1.00  
 G81: 1.00  
 G82: 1.00  
 G83: 1.00  
 G84: 1.00  
 G85: 1.00  
 G86: 1.00  
 G87: 1.00  
 G88: 1.00  
 G89: 1.00  
 G90: 1.00  
 G91: 1.00  
 G92: 1.00  
 G93: 1.00  
 G94: 1.00  
 G95: 1.00  
 G96: 1.00  
 G97: 1.00  
 G98: 1.00  
 G99: 1.00  
 G100: 1.00

3a <sup>13</sup>C and DEPT

1D-HSQC NOESY PHASE SENS. / 301K  
 01-56 : TR1=1.00

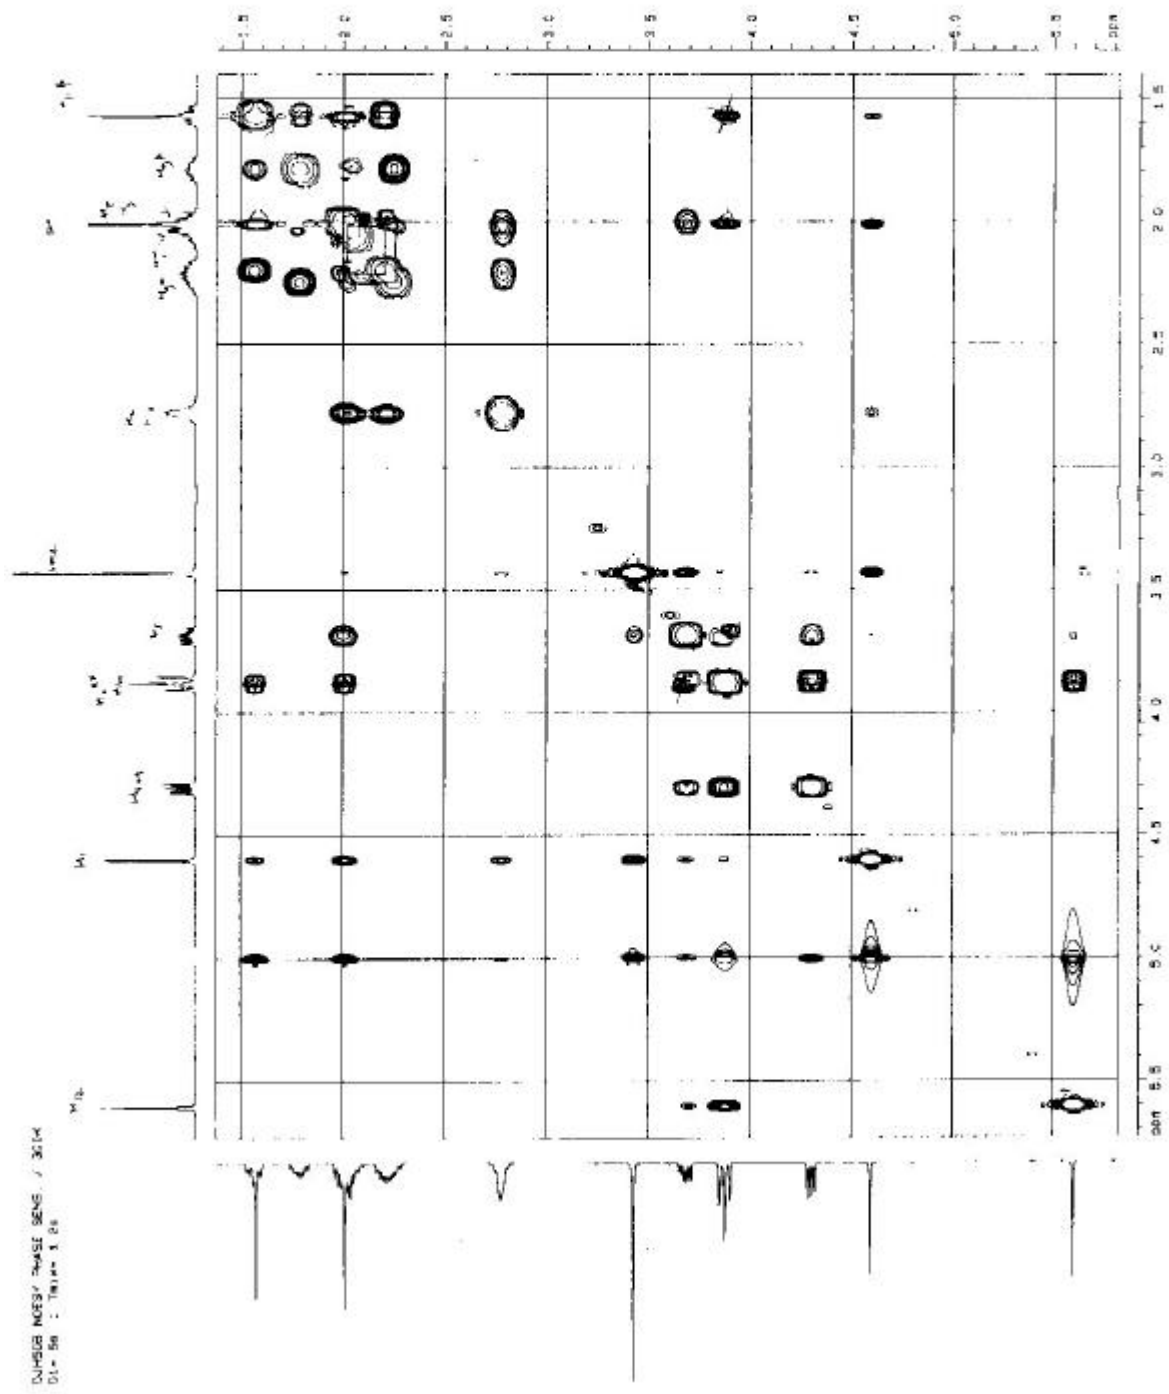

Current Date Parameters  
 NAME 01-56  
 PRODC 1

F2 - Acquisition Parameters  
 DSOLV DMSO-D6  
 TMR 300.13  
 FREQ 400.146300  
 PULPROG zgpg30  
 ALPHAS 0.000000  
 SOLVENT DMSO  
 DSOLV DMSO-D6  
 NS 1024  
 DS 4  
 SWH 12000.000  
 F2 300.130000  
 T 3.000000  
 AQ 0.100000  
 RG 655.360000  
 DB 1.000000  
 B1 1.000000  
 B2 1.000000  
 B3 1.000000  
 B4 1.000000  
 B5 1.000000  
 B6 1.000000  
 B7 1.000000  
 B8 1.000000  
 B9 1.000000  
 B10 1.000000  
 B11 1.000000  
 B12 1.000000  
 B13 1.000000  
 B14 1.000000  
 B15 1.000000  
 B16 1.000000  
 B17 1.000000  
 B18 1.000000  
 B19 1.000000  
 B20 1.000000

F1 - Processing parameters  
 SI 32768  
 SF 400.146300  
 DS 4  
 SWH 12000.000  
 FWHM 1.000000  
 A 0.000000  
 SFO 300.130000  
 T 3.000000  
 G 0.000000  
 W 0.000000  
 L 0.000000  
 B 0.000000  
 Z 0.000000  
 GB 0.000000  
 PC 1.000000  
 MC 1.000000  
 MD 1.000000  
 ME 1.000000  
 MF 1.000000  
 MG 1.000000  
 MH 1.000000  
 MI 1.000000  
 MJ 1.000000  
 MK 1.000000  
 ML 1.000000  
 MM 1.000000  
 MN 1.000000  
 MO 1.000000  
 MP 1.000000  
 MQ 1.000000  
 MR 1.000000  
 MS 1.000000  
 MT 1.000000  
 MU 1.000000  
 MV 1.000000  
 MW 1.000000  
 MX 1.000000  
 MY 1.000000  
 MZ 1.000000  
 N1 1.000000  
 N2 1.000000  
 N3 1.000000  
 N4 1.000000  
 N5 1.000000  
 N6 1.000000  
 N7 1.000000  
 N8 1.000000  
 N9 1.000000  
 N10 1.000000  
 N11 1.000000  
 N12 1.000000  
 N13 1.000000  
 N14 1.000000  
 N15 1.000000  
 N16 1.000000  
 N17 1.000000  
 N18 1.000000  
 N19 1.000000  
 N20 1.000000

2D NMR Data Parameters  
 SI 32768  
 SF 400.146300  
 DS 4  
 SWH 12000.000  
 FWHM 1.000000  
 A 0.000000  
 SFO 300.130000  
 T 3.000000  
 G 0.000000  
 W 0.000000  
 L 0.000000  
 B 0.000000  
 Z 0.000000  
 GB 0.000000  
 PC 1.000000  
 MC 1.000000  
 MD 1.000000  
 ME 1.000000  
 MF 1.000000  
 MG 1.000000  
 MH 1.000000  
 MI 1.000000  
 MJ 1.000000  
 MK 1.000000  
 ML 1.000000  
 MM 1.000000  
 MN 1.000000  
 MO 1.000000  
 MP 1.000000  
 MQ 1.000000  
 MR 1.000000  
 MS 1.000000  
 MT 1.000000  
 MU 1.000000  
 MV 1.000000  
 MW 1.000000  
 MX 1.000000  
 MY 1.000000  
 MZ 1.000000  
 N1 1.000000  
 N2 1.000000  
 N3 1.000000  
 N4 1.000000  
 N5 1.000000  
 N6 1.000000  
 N7 1.000000  
 N8 1.000000  
 N9 1.000000  
 N10 1.000000  
 N11 1.000000  
 N12 1.000000  
 N13 1.000000  
 N14 1.000000  
 N15 1.000000  
 N16 1.000000  
 N17 1.000000  
 N18 1.000000  
 N19 1.000000  
 N20 1.000000

3a NOESY

Current Data Parameters  
 NAME: 11005  
 EXPNO: 3  
 PROCNO: 1

F2 - ACQUISITION PARAMETERS  
 DATE\_: 20050804  
 TIME\_: 10.00  
 INSTRUM: spect  
 PRGNAME: zgpg30  
 F2: 500.136134  
 PULPROG: zgpg30  
 PC: 1024  
 GC: 0  
 GZ: 0  
 DPH: 0  
 SFO: 500.136134  
 AQ: 1.00000000  
 F4: 0.00000000  
 SFO2: 0.00000000  
 A2: 0.00000000  
 F2A2: 0.00000000  
 SFOA2: 0.00000000  
 A4: 0.00000000  
 F2A4: 0.00000000  
 SFOA4: 0.00000000  
 A6: 0.00000000  
 F2A6: 0.00000000  
 SFOA6: 0.00000000  
 A8: 0.00000000  
 F2A8: 0.00000000  
 SFOA8: 0.00000000  
 A10: 0.00000000  
 F2A10: 0.00000000  
 SFOA10: 0.00000000  
 A12: 0.00000000  
 F2A12: 0.00000000  
 SFOA12: 0.00000000  
 A14: 0.00000000  
 F2A14: 0.00000000  
 SFOA14: 0.00000000  
 A16: 0.00000000  
 F2A16: 0.00000000  
 SFOA16: 0.00000000  
 A18: 0.00000000  
 F2A18: 0.00000000  
 SFOA18: 0.00000000  
 A20: 0.00000000  
 F2A20: 0.00000000  
 SFOA20: 0.00000000  
 A22: 0.00000000  
 F2A22: 0.00000000  
 SFOA22: 0.00000000  
 A24: 0.00000000  
 F2A24: 0.00000000  
 SFOA24: 0.00000000  
 A26: 0.00000000  
 F2A26: 0.00000000  
 SFOA26: 0.00000000  
 A28: 0.00000000  
 F2A28: 0.00000000  
 SFOA28: 0.00000000  
 A30: 0.00000000  
 F2A30: 0.00000000  
 SFOA30: 0.00000000  
 A32: 0.00000000  
 F2A32: 0.00000000  
 SFOA32: 0.00000000  
 A34: 0.00000000  
 F2A34: 0.00000000  
 SFOA34: 0.00000000  
 A36: 0.00000000  
 F2A36: 0.00000000  
 SFOA36: 0.00000000  
 A38: 0.00000000  
 F2A38: 0.00000000  
 SFOA38: 0.00000000  
 A40: 0.00000000  
 F2A40: 0.00000000  
 SFOA40: 0.00000000  
 A42: 0.00000000  
 F2A42: 0.00000000  
 SFOA42: 0.00000000  
 A44: 0.00000000  
 F2A44: 0.00000000  
 SFOA44: 0.00000000  
 A46: 0.00000000  
 F2A46: 0.00000000  
 SFOA46: 0.00000000  
 A48: 0.00000000  
 F2A48: 0.00000000  
 SFOA48: 0.00000000  
 A50: 0.00000000  
 F2A50: 0.00000000  
 SFOA50: 0.00000000  
 A52: 0.00000000  
 F2A52: 0.00000000  
 SFOA52: 0.00000000  
 A54: 0.00000000  
 F2A54: 0.00000000  
 SFOA54: 0.00000000  
 A56: 0.00000000  
 F2A56: 0.00000000  
 SFOA56: 0.00000000  
 A58: 0.00000000  
 F2A58: 0.00000000  
 SFOA58: 0.00000000  
 A60: 0.00000000  
 F2A60: 0.00000000  
 SFOA60: 0.00000000  
 A62: 0.00000000  
 F2A62: 0.00000000  
 SFOA62: 0.00000000  
 A64: 0.00000000  
 F2A64: 0.00000000  
 SFOA64: 0.00000000  
 A66: 0.00000000  
 F2A66: 0.00000000  
 SFOA66: 0.00000000  
 A68: 0.00000000  
 F2A68: 0.00000000  
 SFOA68: 0.00000000  
 A70: 0.00000000  
 F2A70: 0.00000000  
 SFOA70: 0.00000000  
 A72: 0.00000000  
 F2A72: 0.00000000  
 SFOA72: 0.00000000  
 A74: 0.00000000  
 F2A74: 0.00000000  
 SFOA74: 0.00000000  
 A76: 0.00000000  
 F2A76: 0.00000000  
 SFOA76: 0.00000000  
 A78: 0.00000000  
 F2A78: 0.00000000  
 SFOA78: 0.00000000  
 A80: 0.00000000  
 F2A80: 0.00000000  
 SFOA80: 0.00000000  
 A82: 0.00000000  
 F2A82: 0.00000000  
 SFOA82: 0.00000000  
 A84: 0.00000000  
 F2A84: 0.00000000  
 SFOA84: 0.00000000  
 A86: 0.00000000  
 F2A86: 0.00000000  
 SFOA86: 0.00000000  
 A88: 0.00000000  
 F2A88: 0.00000000  
 SFOA88: 0.00000000  
 A90: 0.00000000  
 F2A90: 0.00000000  
 SFOA90: 0.00000000  
 A92: 0.00000000  
 F2A92: 0.00000000  
 SFOA92: 0.00000000  
 A94: 0.00000000  
 F2A94: 0.00000000  
 SFOA94: 0.00000000  
 A96: 0.00000000  
 F2A96: 0.00000000  
 SFOA96: 0.00000000  
 A98: 0.00000000  
 F2A98: 0.00000000  
 SFOA98: 0.00000000  
 A100: 0.00000000  
 F2A100: 0.00000000  
 SFOA100: 0.00000000

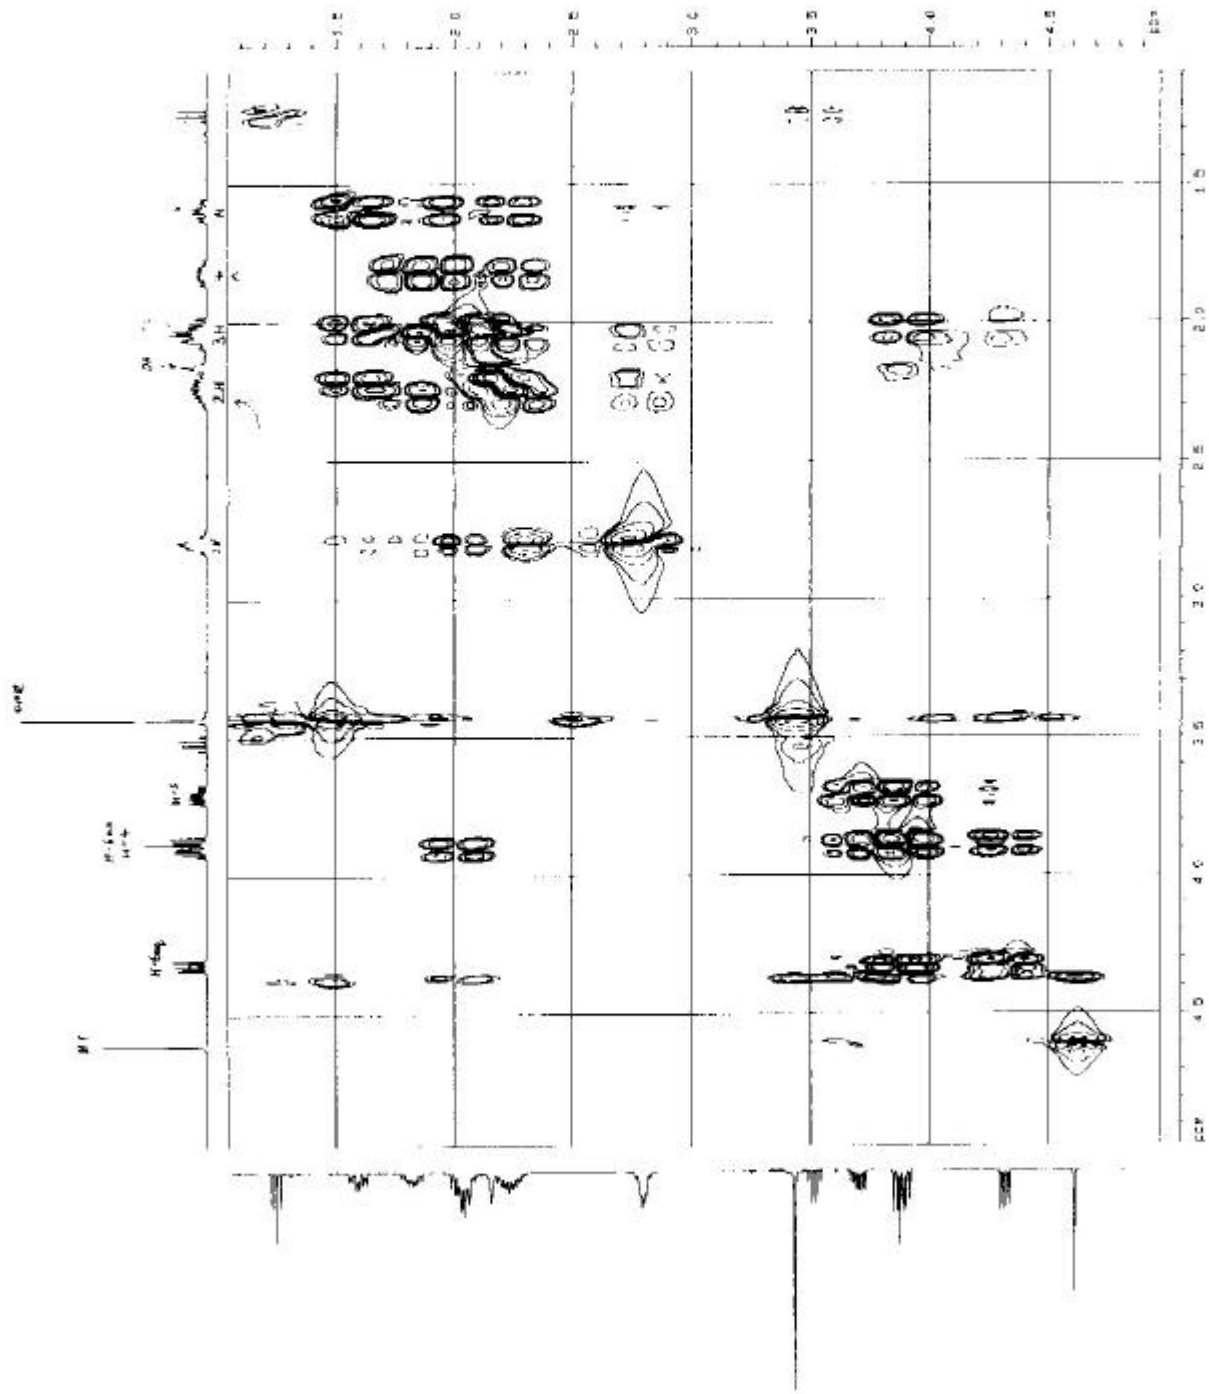

3a COSY

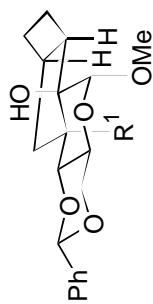

3b proton nmr

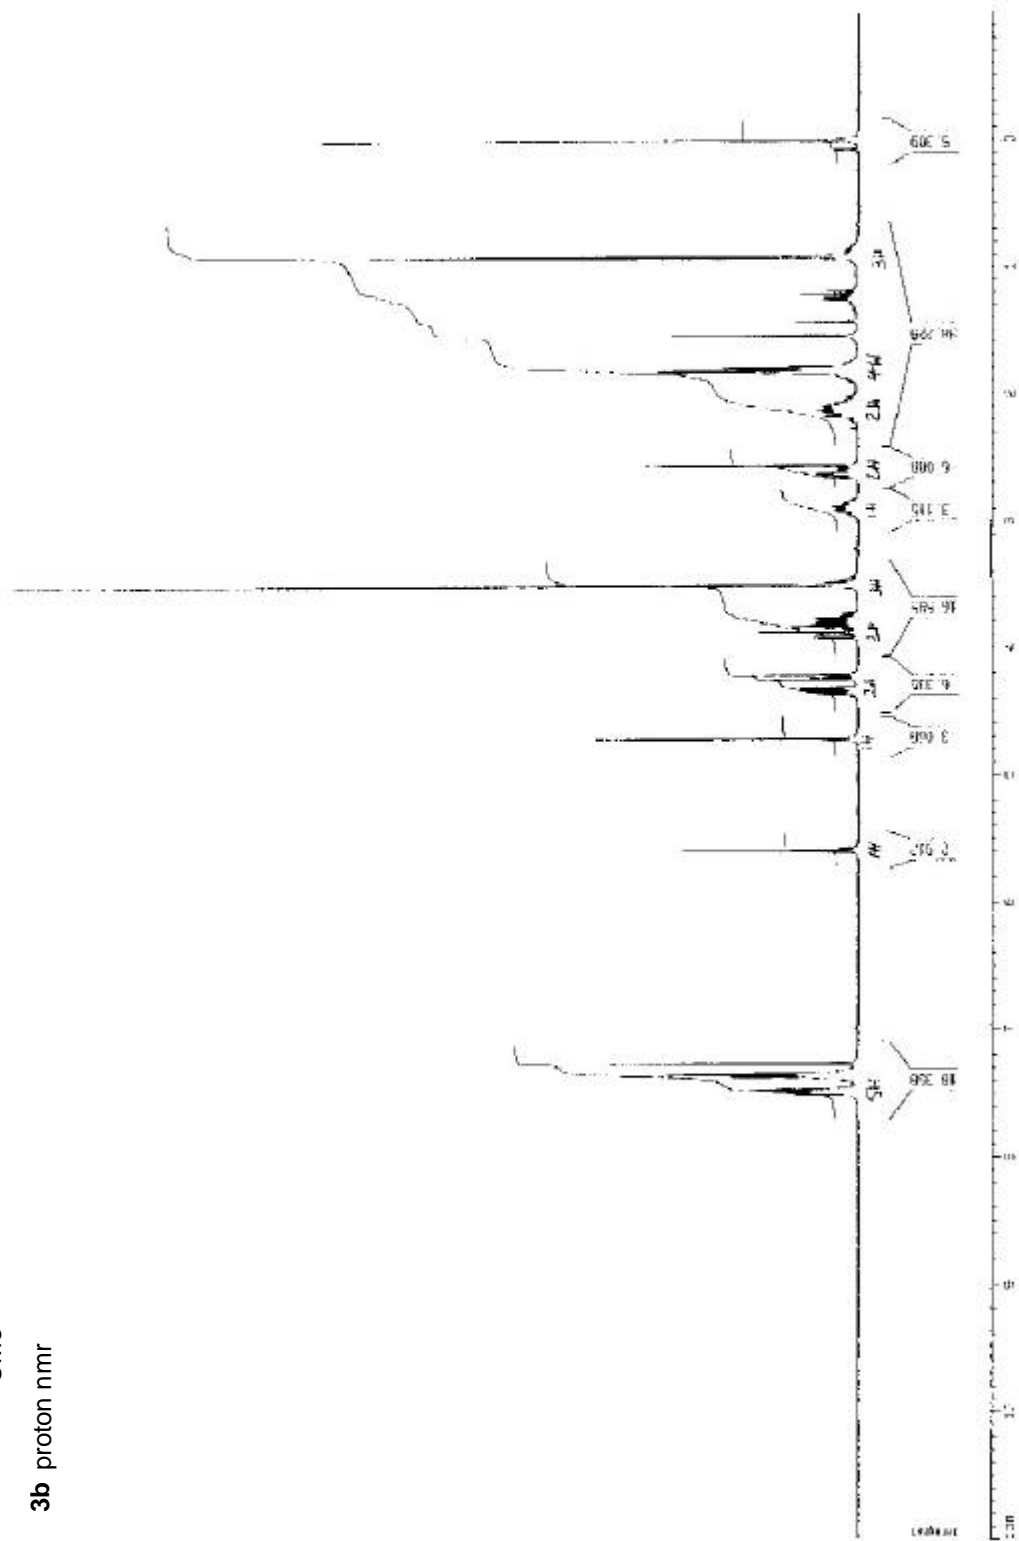

Current Data Parameters  
 NAME: EPT154  
 EXPNO: 2  
 PROCNO: 1

12 - Acquisition Parameters  
 Date\_ Time: 06/21/15  
 12:15  
 PULPROG: zgpg30  
 SOLVENT: DMSO  
 AS: 3.1765358440  
 F1 F2: C 252.507 P2  
 DE: 57.0 MHz  
 BE: 5430  
 NUC1E15: 1H  
 DE: 1.0000000000  
 F1: 500.136461  
 DE: 128.130000  
 SFO1: 250.136461 MHz  
 SWH: 5152.54 MHz  
 F0: 500.136461  
 XQ: 10  
 YQ: 10  
 ZQ: 0

13 - Processing parameters  
 SI: 32768  
 SF: 250.136461 MHz  
 MD: EM  
 SB: C  
 LB: 0.30 Hz  
 GB: 0  
 RB: 1.00

10 - Acquisition parameters  
 CA: 30.00 deg  
 F1: 252.507 MHz  
 F2: 500.136461 MHz  
 PWDW: 2.4200000000  
 ACD: 0.0000000000







udo

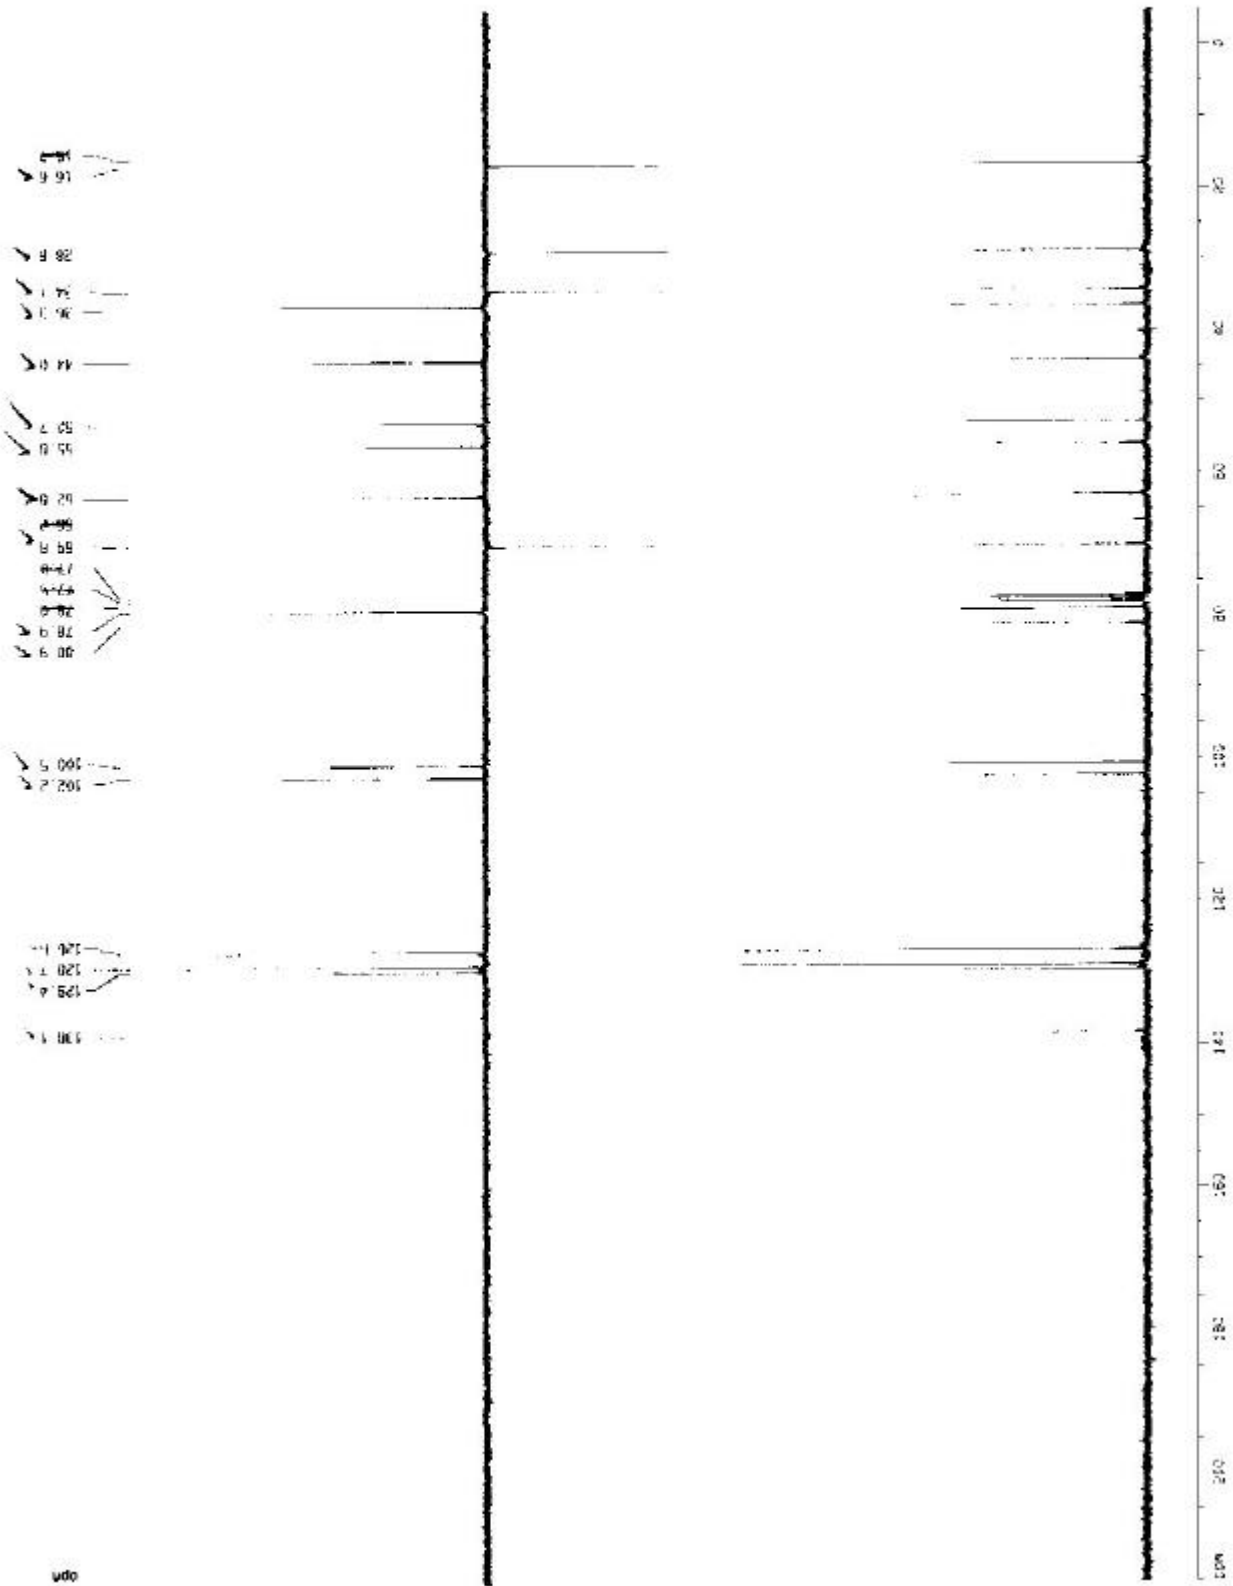

Current Data Parameters  
NAME 21-583  
EXPNO 12  
PROCNO 1

F2 - Acquisition Parameters  
Date\_ 200508  
Time 15:19  
PULPROG zgpg30  
SOLVENT DMSO  
AQ 1.6564200 sec  
RG 327.000 Hz  
Dk 35.0 uHz  
PC 38768

NAME 13C  
D1 0.000000 sec  
D2 18.000000 sec  
D3 1.000000 sec  
D4 100.000000 sec  
D5 18.000000 sec  
D6 7.000000 sec  
D7 35.700000 sec  
SFO1 62.845587 MHz  
SFO2 300.000000 MHz  
SFO3 62.845587 MHz  
SFO4 300.000000 MHz  
SFO5 62.845587 MHz  
SFO6 300.000000 MHz  
SFO7 62.845587 MHz  
SFO8 300.000000 MHz  
SFO9 62.845587 MHz  
SFO10 300.000000 MHz  
SFO11 62.845587 MHz  
SFO12 300.000000 MHz  
SFO13 62.845587 MHz  
SFO14 300.000000 MHz  
SFO15 62.845587 MHz  
SFO16 300.000000 MHz  
SFO17 62.845587 MHz  
SFO18 300.000000 MHz  
SFO19 62.845587 MHz  
SFO20 300.000000 MHz  
SFO21 62.845587 MHz  
SFO22 300.000000 MHz  
SFO23 62.845587 MHz  
SFO24 300.000000 MHz  
SFO25 62.845587 MHz  
SFO26 300.000000 MHz  
SFO27 62.845587 MHz  
SFO28 300.000000 MHz  
SFO29 62.845587 MHz  
SFO30 300.000000 MHz  
SFO31 62.845587 MHz  
SFO32 300.000000 MHz  
SFO33 62.845587 MHz  
SFO34 300.000000 MHz  
SFO35 62.845587 MHz  
SFO36 300.000000 MHz  
SFO37 62.845587 MHz  
SFO38 300.000000 MHz  
SFO39 62.845587 MHz  
SFO40 300.000000 MHz  
SFO41 62.845587 MHz  
SFO42 300.000000 MHz  
SFO43 62.845587 MHz  
SFO44 300.000000 MHz  
SFO45 62.845587 MHz  
SFO46 300.000000 MHz  
SFO47 62.845587 MHz  
SFO48 300.000000 MHz  
SFO49 62.845587 MHz  
SFO50 300.000000 MHz  
SFO51 62.845587 MHz  
SFO52 300.000000 MHz  
SFO53 62.845587 MHz  
SFO54 300.000000 MHz  
SFO55 62.845587 MHz  
SFO56 300.000000 MHz  
SFO57 62.845587 MHz  
SFO58 300.000000 MHz  
SFO59 62.845587 MHz  
SFO60 300.000000 MHz  
SFO61 62.845587 MHz  
SFO62 300.000000 MHz  
SFO63 62.845587 MHz  
SFO64 300.000000 MHz  
SFO65 62.845587 MHz  
SFO66 300.000000 MHz  
SFO67 62.845587 MHz  
SFO68 300.000000 MHz  
SFO69 62.845587 MHz  
SFO70 300.000000 MHz  
SFO71 62.845587 MHz  
SFO72 300.000000 MHz  
SFO73 62.845587 MHz  
SFO74 300.000000 MHz  
SFO75 62.845587 MHz  
SFO76 300.000000 MHz  
SFO77 62.845587 MHz  
SFO78 300.000000 MHz  
SFO79 62.845587 MHz  
SFO80 300.000000 MHz  
SFO81 62.845587 MHz  
SFO82 300.000000 MHz  
SFO83 62.845587 MHz  
SFO84 300.000000 MHz  
SFO85 62.845587 MHz  
SFO86 300.000000 MHz  
SFO87 62.845587 MHz  
SFO88 300.000000 MHz  
SFO89 62.845587 MHz  
SFO90 300.000000 MHz  
SFO91 62.845587 MHz  
SFO92 300.000000 MHz  
SFO93 62.845587 MHz  
SFO94 300.000000 MHz  
SFO95 62.845587 MHz  
SFO96 300.000000 MHz  
SFO97 62.845587 MHz  
SFO98 300.000000 MHz  
SFO99 62.845587 MHz  
SFO100 300.000000 MHz  
SFO101 62.845587 MHz  
SFO102 300.000000 MHz  
SFO103 62.845587 MHz  
SFO104 300.000000 MHz  
SFO105 62.845587 MHz  
SFO106 300.000000 MHz  
SFO107 62.845587 MHz  
SFO108 300.000000 MHz  
SFO109 62.845587 MHz  
SFO110 300.000000 MHz  
SFO111 62.845587 MHz  
SFO112 300.000000 MHz  
SFO113 62.845587 MHz  
SFO114 300.000000 MHz  
SFO115 62.845587 MHz  
SFO116 300.000000 MHz  
SFO117 62.845587 MHz  
SFO118 300.000000 MHz  
SFO119 62.845587 MHz  
SFO120 300.000000 MHz  
SFO121 62.845587 MHz  
SFO122 300.000000 MHz  
SFO123 62.845587 MHz  
SFO124 300.000000 MHz  
SFO125 62.845587 MHz  
SFO126 300.000000 MHz  
SFO127 62.845587 MHz  
SFO128 300.000000 MHz  
SFO129 62.845587 MHz  
SFO130 300.000000 MHz  
SFO131 62.845587 MHz  
SFO132 300.000000 MHz  
SFO133 62.845587 MHz  
SFO134 300.000000 MHz  
SFO135 62.845587 MHz  
SFO136 300.000000 MHz  
SFO137 62.845587 MHz  
SFO138 300.000000 MHz  
SFO139 62.845587 MHz  
SFO140 300.000000 MHz  
SFO141 62.845587 MHz  
SFO142 300.000000 MHz  
SFO143 62.845587 MHz  
SFO144 300.000000 MHz  
SFO145 62.845587 MHz  
SFO146 300.000000 MHz  
SFO147 62.845587 MHz  
SFO148 300.000000 MHz  
SFO149 62.845587 MHz  
SFO150 300.000000 MHz  
SFO151 62.845587 MHz  
SFO152 300.000000 MHz  
SFO153 62.845587 MHz  
SFO154 300.000000 MHz  
SFO155 62.845587 MHz  
SFO156 300.000000 MHz  
SFO157 62.845587 MHz  
SFO158 300.000000 MHz  
SFO159 62.845587 MHz  
SFO160 300.000000 MHz  
SFO161 62.845587 MHz  
SFO162 300.000000 MHz  
SFO163 62.845587 MHz  
SFO164 300.000000 MHz  
SFO165 62.845587 MHz  
SFO166 300.000000 MHz  
SFO167 62.845587 MHz  
SFO168 300.000000 MHz  
SFO169 62.845587 MHz  
SFO170 300.000000 MHz  
SFO171 62.845587 MHz  
SFO172 300.000000 MHz  
SFO173 62.845587 MHz  
SFO174 300.000000 MHz  
SFO175 62.845587 MHz  
SFO176 300.000000 MHz  
SFO177 62.845587 MHz  
SFO178 300.000000 MHz  
SFO179 62.845587 MHz  
SFO180 300.000000 MHz  
SFO181 62.845587 MHz  
SFO182 300.000000 MHz  
SFO183 62.845587 MHz  
SFO184 300.000000 MHz  
SFO185 62.845587 MHz  
SFO186 300.000000 MHz  
SFO187 62.845587 MHz  
SFO188 300.000000 MHz  
SFO189 62.845587 MHz  
SFO190 300.000000 MHz  
SFO191 62.845587 MHz  
SFO192 300.000000 MHz  
SFO193 62.845587 MHz  
SFO194 300.000000 MHz  
SFO195 62.845587 MHz  
SFO196 300.000000 MHz  
SFO197 62.845587 MHz  
SFO198 300.000000 MHz  
SFO199 62.845587 MHz  
SFO200 300.000000 MHz

F2 - Processing parameters  
SI 32768  
SF 300.000000 MHz  
WDW EM  
SSB 0  
LB 1.00 Hz  
GB 0  
PC 1.40

F2 - MVD parameters  
Dk 35.000000 Hz  
F2 315.000000 MHz  
F3 300.000000 MHz  
F4 300.000000 MHz  
F5 300.000000 MHz  
F6 300.000000 MHz  
F7 300.000000 MHz  
F8 300.000000 MHz  
F9 300.000000 MHz  
F10 300.000000 MHz  
F11 300.000000 MHz  
F12 300.000000 MHz  
F13 300.000000 MHz  
F14 300.000000 MHz  
F15 300.000000 MHz  
F16 300.000000 MHz  
F17 300.000000 MHz  
F18 300.000000 MHz  
F19 300.000000 MHz  
F20 300.000000 MHz  
F21 300.000000 MHz  
F22 300.000000 MHz  
F23 300.000000 MHz  
F24 300.000000 MHz  
F25 300.000000 MHz  
F26 300.000000 MHz  
F27 300.000000 MHz  
F28 300.000000 MHz  
F29 300.000000 MHz  
F30 300.000000 MHz  
F31 300.000000 MHz  
F32 300.000000 MHz  
F33 300.000000 MHz  
F34 300.000000 MHz  
F35 300.000000 MHz  
F36 300.000000 MHz  
F37 300.000000 MHz  
F38 300.000000 MHz  
F39 300.000000 MHz  
F40 300.000000 MHz  
F41 300.000000 MHz  
F42 300.000000 MHz  
F43 300.000000 MHz  
F44 300.000000 MHz  
F45 300.000000 MHz  
F46 300.000000 MHz  
F47 300.000000 MHz  
F48 300.000000 MHz  
F49 300.000000 MHz  
F50 300.000000 MHz  
F51 300.000000 MHz  
F52 300.000000 MHz  
F53 300.000000 MHz  
F54 300.000000 MHz  
F55 300.000000 MHz  
F56 300.000000 MHz  
F57 300.000000 MHz  
F58 300.000000 MHz  
F59 300.000000 MHz  
F60 300.000000 MHz  
F61 300.000000 MHz  
F62 300.000000 MHz  
F63 300.000000 MHz  
F64 300.000000 MHz  
F65 300.000000 MHz  
F66 300.000000 MHz  
F67 300.000000 MHz  
F68 300.000000 MHz  
F69 300.000000 MHz  
F70 300.000000 MHz  
F71 300.000000 MHz  
F72 300.000000 MHz  
F73 300.000000 MHz  
F74 300.000000 MHz  
F75 300.000000 MHz  
F76 300.000000 MHz  
F77 300.000000 MHz  
F78 300.000000 MHz  
F79 300.000000 MHz  
F80 300.000000 MHz  
F81 300.000000 MHz  
F82 300.000000 MHz  
F83 300.000000 MHz  
F84 300.000000 MHz  
F85 300.000000 MHz  
F86 300.000000 MHz  
F87 300.000000 MHz  
F88 300.000000 MHz  
F89 300.000000 MHz  
F90 300.000000 MHz  
F91 300.000000 MHz  
F92 300.000000 MHz  
F93 300.000000 MHz  
F94 300.000000 MHz  
F95 300.000000 MHz  
F96 300.000000 MHz  
F97 300.000000 MHz  
F98 300.000000 MHz  
F99 300.000000 MHz  
F100 300.000000 MHz  
F101 300.000000 MHz  
F102 300.000000 MHz  
F103 300.000000 MHz  
F104 300.000000 MHz  
F105 300.000000 MHz  
F106 300.000000 MHz  
F107 300.000000 MHz  
F108 300.000000 MHz  
F109 300.000000 MHz  
F110 300.000000 MHz  
F111 300.000000 MHz  
F112 300.000000 MHz  
F113 300.000000 MHz  
F114 300.000000 MHz  
F115 300.000000 MHz  
F116 300.000000 MHz  
F117 300.000000 MHz  
F118 300.000000 MHz  
F119 300.000000 MHz  
F120 300.000000 MHz  
F121 300.000000 MHz  
F122 300.000000 MHz  
F123 300.000000 MHz  
F124 300.000000 MHz  
F125 300.000000 MHz  
F126 300.000000 MHz  
F127 300.000000 MHz  
F128 300.000000 MHz  
F129 300.000000 MHz  
F130 300.000000 MHz  
F131 300.000000 MHz  
F132 300.000000 MHz  
F133 300.000000 MHz  
F134 300.000000 MHz  
F135 300.000000 MHz  
F136 300.000000 MHz  
F137 300.000000 MHz  
F138 300.000000 MHz  
F139 300.000000 MHz  
F140 300.000000 MHz  
F141 300.000000 MHz  
F142 300.000000 MHz  
F143 300.000000 MHz  
F144 300.000000 MHz  
F145 300.000000 MHz  
F146 300.000000 MHz  
F147 300.000000 MHz  
F148 300.000000 MHz  
F149 300.000000 MHz  
F150 300.000000 MHz  
F151 300.000000 MHz  
F152 300.000000 MHz  
F153 300.000000 MHz  
F154 300.000000 MHz  
F155 300.000000 MHz  
F156 300.000000 MHz  
F157 300.000000 MHz  
F158 300.000000 MHz  
F159 300.000000 MHz  
F160 300.000000 MHz  
F161 300.000000 MHz  
F162 300.000000 MHz  
F163 300.000000 MHz  
F164 300.000000 MHz  
F165 300.000000 MHz  
F166 300.000000 MHz  
F167 300.000000 MHz  
F168 300.000000 MHz  
F169 300.000000 MHz  
F170 300.000000 MHz  
F171 300.000000 MHz  
F172 300.000000 MHz  
F173 300.000000 MHz  
F174 300.000000 MHz  
F175 300.000000 MHz  
F176 300.000000 MHz  
F177 300.000000 MHz  
F178 300.000000 MHz  
F179 300.000000 MHz  
F180 300.000000 MHz  
F181 300.000000 MHz  
F182 300.000000 MHz  
F183 300.000000 MHz  
F184 300.000000 MHz  
F185 300.000000 MHz  
F186 300.000000 MHz  
F187 300.000000 MHz  
F188 300.000000 MHz  
F189 300.000000 MHz  
F190 300.000000 MHz  
F191 300.000000 MHz  
F192 300.000000 MHz  
F193 300.000000 MHz  
F194 300.000000 MHz  
F195 300.000000 MHz  
F196 300.000000 MHz  
F197 300.000000 MHz  
F198 300.000000 MHz  
F199 300.000000 MHz  
F200 300.000000 MHz

### 4 <sup>13</sup>C and DEPT



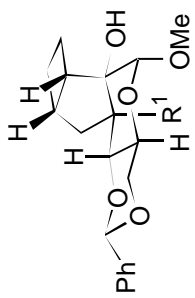

7a, proton nmr

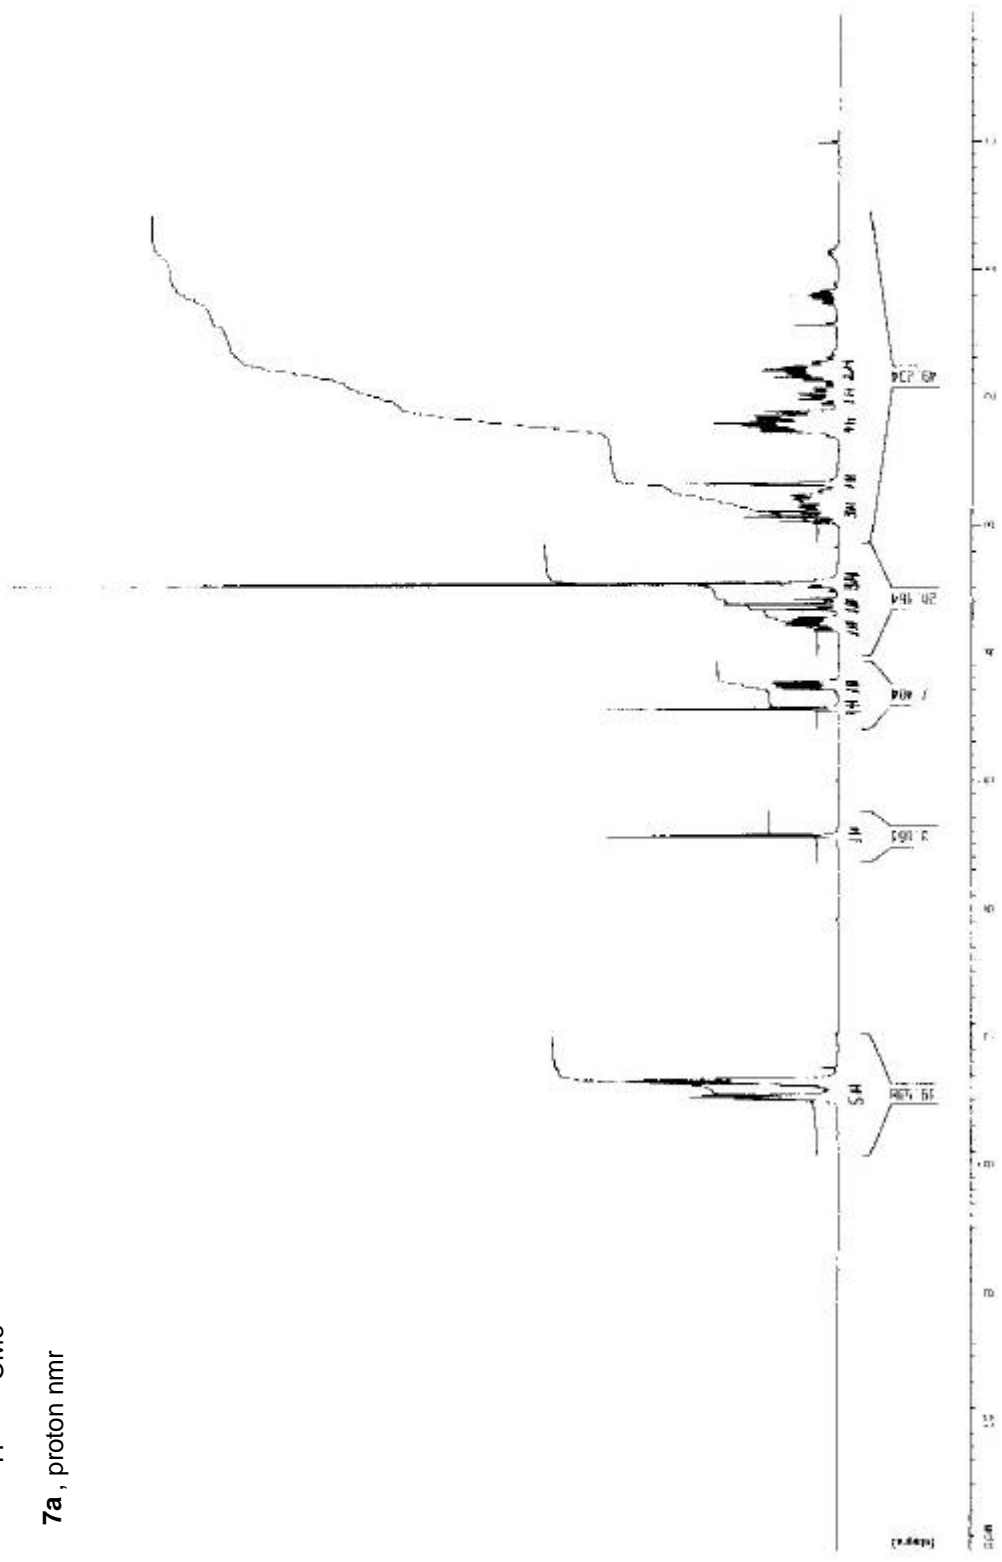

Content Data Parameters  
 NAME: 0110829  
 EXONUM: 11  
 PROTON: 1

F2 - Acquisition Parameters  
 Date: 8/22/99  
 Time: 15:00  
 PULPROG: zgpg30  
 SOLVENT: CDCl3  
 AQ: 3.1780553 sec  
 FIDRES: 0.187537 Hz  
 EQ: 90.000000  
 RS: 258  
 NUC1: 13C  
 C1: 100.62032 sec  
 SFO: 125.761 MHz  
 JE: 100.000000  
 SF2: 250.1304621 MHz  
 EQ2: 90.000000  
 F2: 515.454 Hz  
 T1: 32.738 sec  
 NS: 18  
 DS: 4  
 SC: 2

F2 - Processing parameters  
 SI: 41584  
 SF: 500.1304621 MHz  
 GPC: 1328603 Hz  
 K0: 0  
 SSB: 0  
 LB: 0.30 Hz  
 GB: 0  
 PC: 1.10

10 NMR data parameters  
 CH: 30.30 sec  
 CH2: 15.000 sec  
 CH3: 2781.45 Hz  
 CH4: 17.000 sec  
 CH5: 250.13 Hz  
 CH6: 0.000 sec  
 CH7: 150.000 Hz  
 CH8: 150.000 Hz

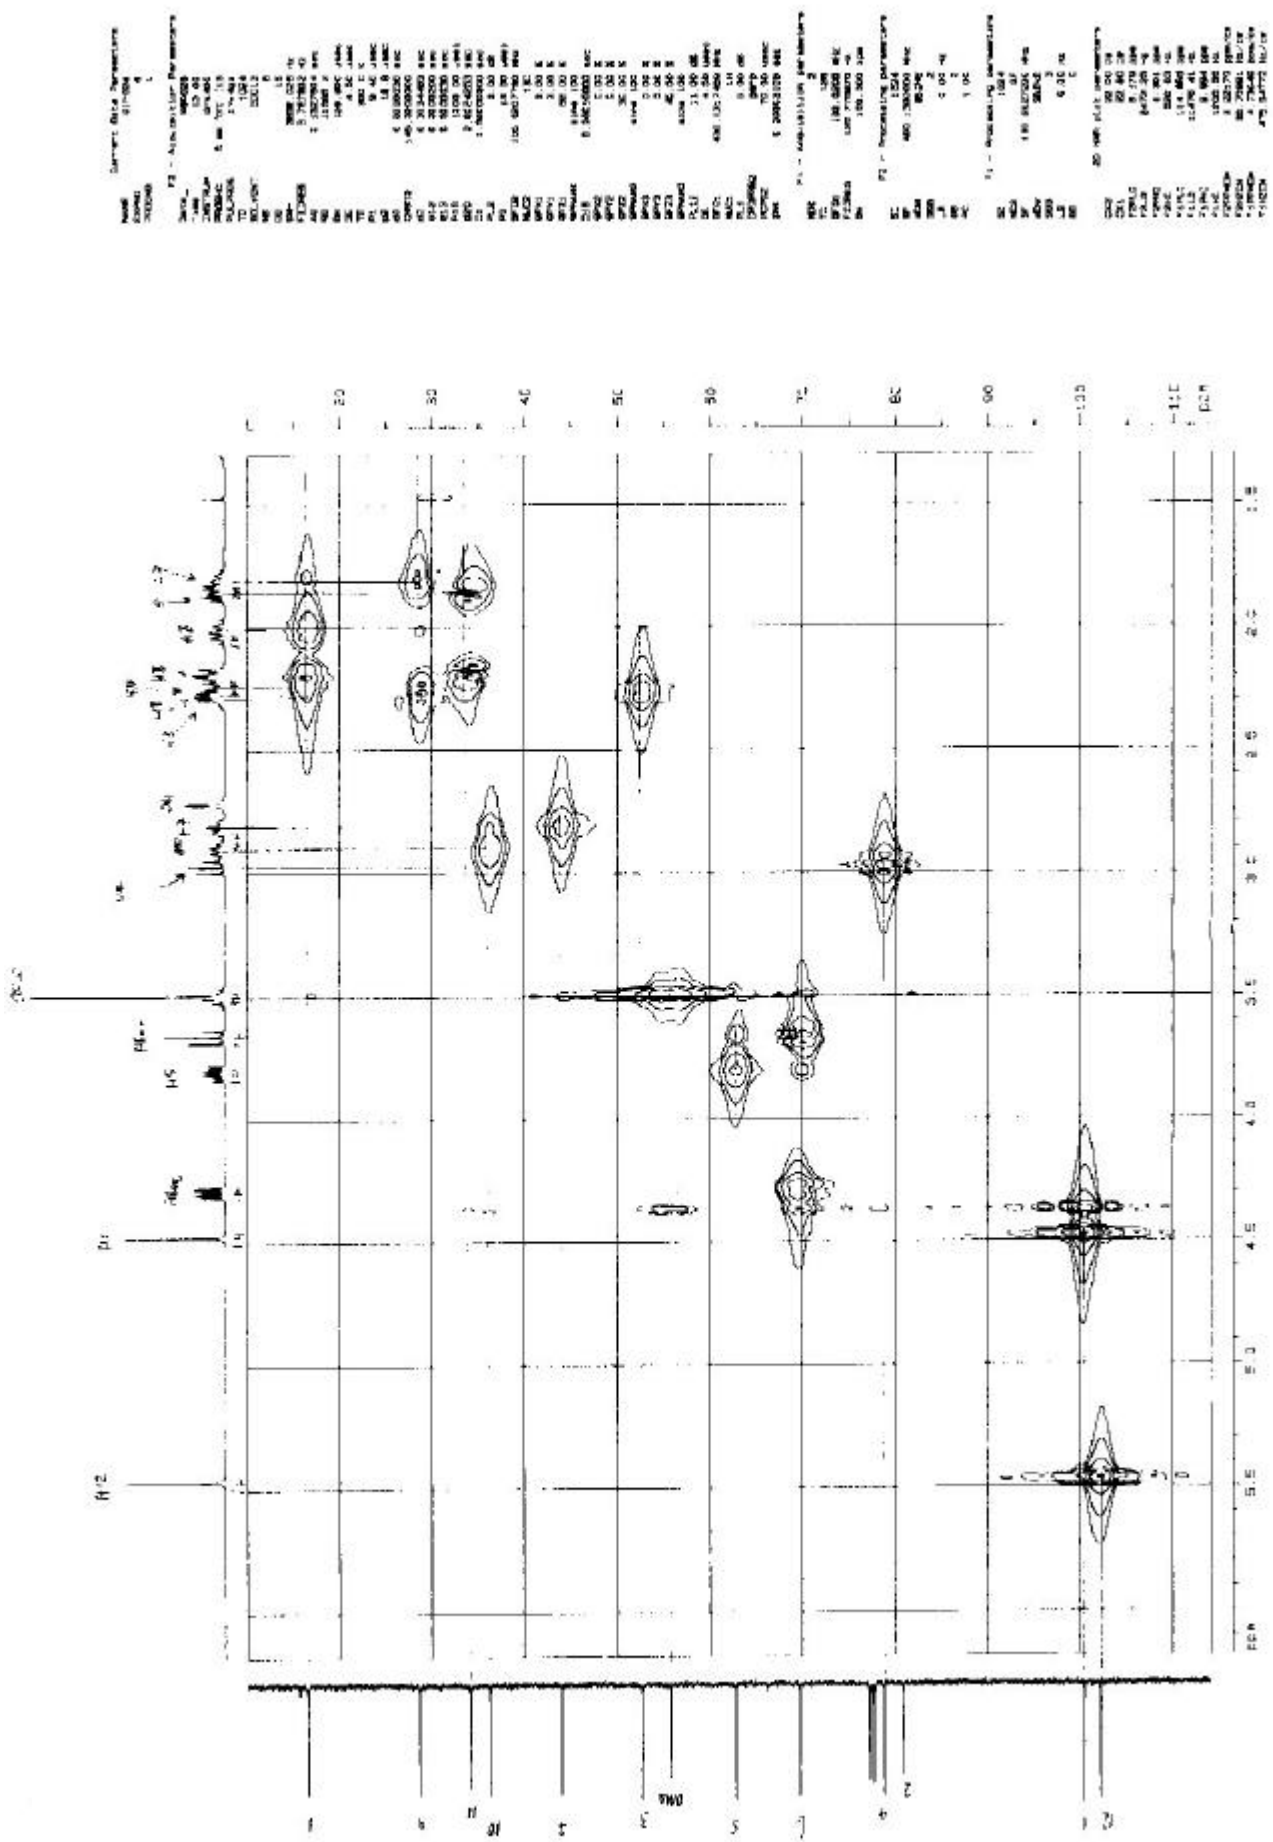

7a <sup>13</sup>C/<sup>1</sup>H correlation





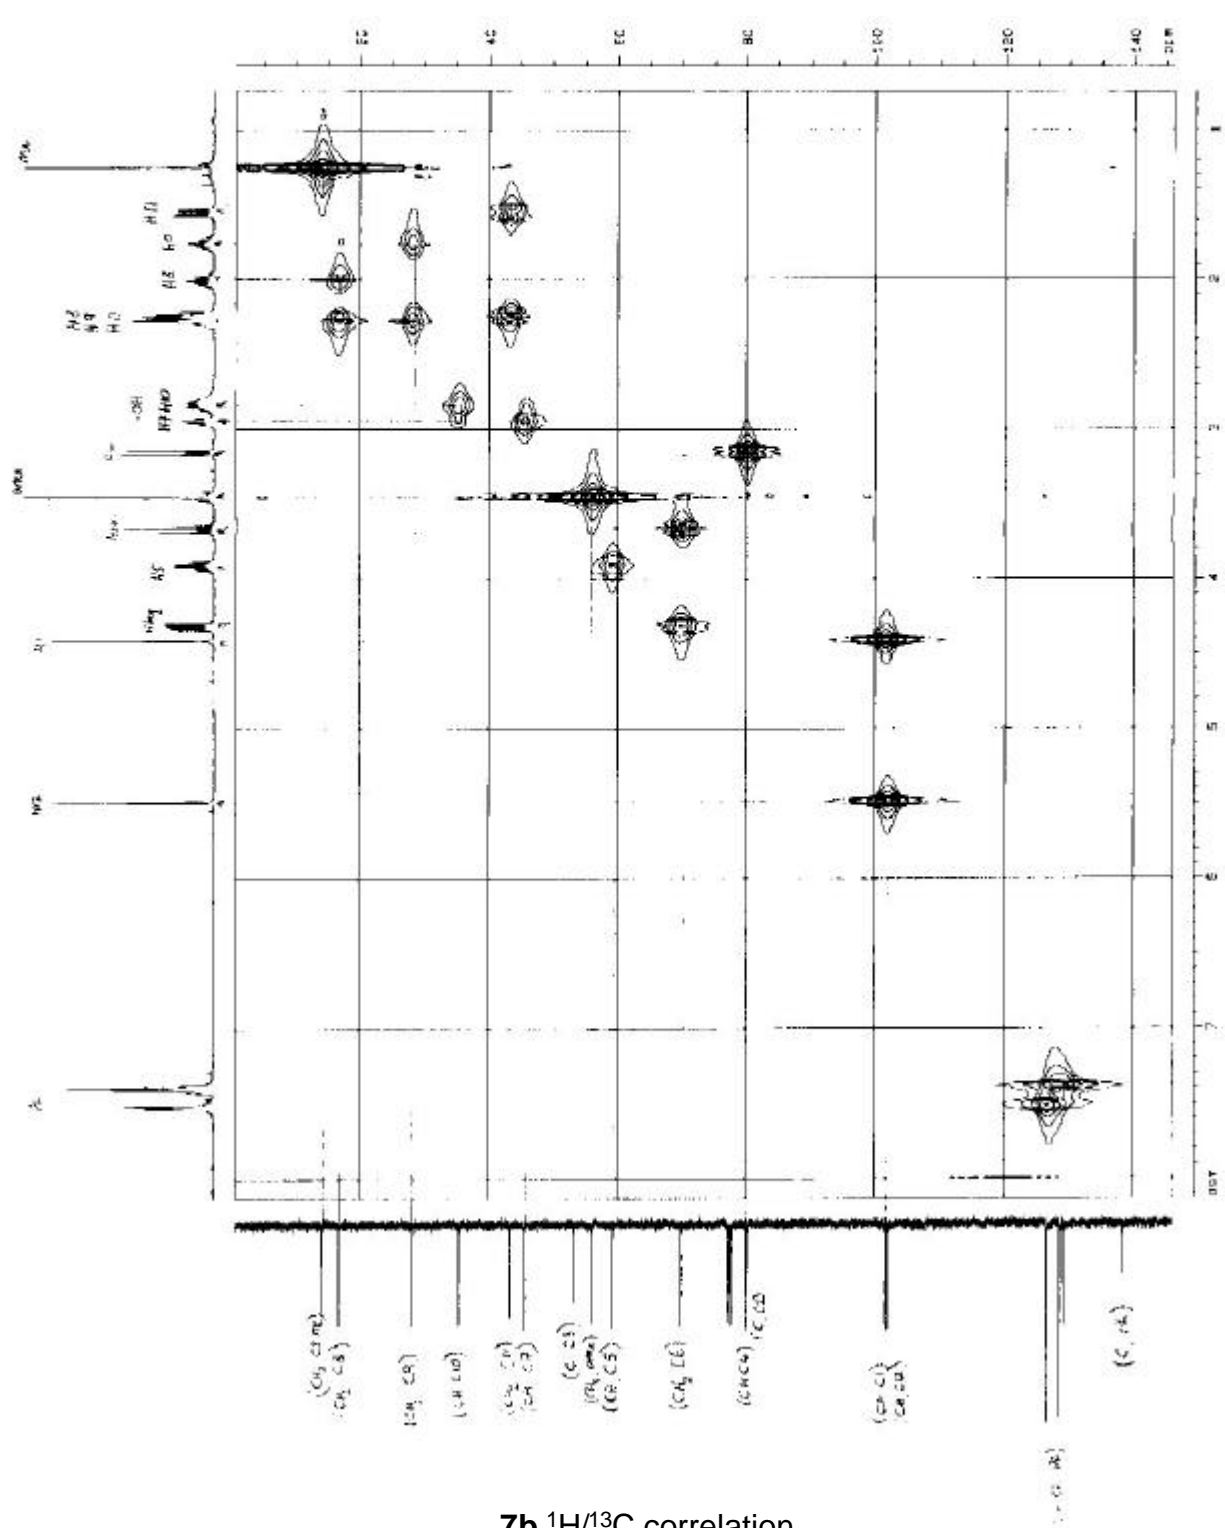

7b <sup>1</sup>H/<sup>13</sup>C correlation

Current Data Parameters

NAME: 7b  
EXPNO: 1  
PROCNO: 1  
PROCPS: 1  
SOLVENT: DMSO  
PULPROG: zgpg30  
TD: 65536  
SFO: 400.146  
AQ: 0.10000000  
RG: 327.680  
RT: 1.00000000  
R2: 0.03000000  
R3: 0.03000000  
R4: 0.03000000  
R5: 0.03000000  
R6: 0.03000000  
R7: 0.03000000  
R8: 0.03000000  
R9: 0.03000000  
R10: 0.03000000  
R11: 0.03000000  
R12: 0.03000000  
R13: 0.03000000  
R14: 0.03000000  
R15: 0.03000000  
R16: 0.03000000  
R17: 0.03000000  
R18: 0.03000000  
R19: 0.03000000  
R20: 0.03000000  
R21: 0.03000000  
R22: 0.03000000  
R23: 0.03000000  
R24: 0.03000000  
R25: 0.03000000  
R26: 0.03000000  
R27: 0.03000000  
R28: 0.03000000  
R29: 0.03000000  
R30: 0.03000000  
R31: 0.03000000  
R32: 0.03000000  
R33: 0.03000000  
R34: 0.03000000  
R35: 0.03000000  
R36: 0.03000000  
R37: 0.03000000  
R38: 0.03000000  
R39: 0.03000000  
R40: 0.03000000  
R41: 0.03000000  
R42: 0.03000000  
R43: 0.03000000  
R44: 0.03000000  
R45: 0.03000000  
R46: 0.03000000  
R47: 0.03000000  
R48: 0.03000000  
R49: 0.03000000  
R50: 0.03000000  
R51: 0.03000000  
R52: 0.03000000  
R53: 0.03000000  
R54: 0.03000000  
R55: 0.03000000  
R56: 0.03000000  
R57: 0.03000000  
R58: 0.03000000  
R59: 0.03000000  
R60: 0.03000000  
R61: 0.03000000  
R62: 0.03000000  
R63: 0.03000000  
R64: 0.03000000  
R65: 0.03000000  
R66: 0.03000000  
R67: 0.03000000  
R68: 0.03000000  
R69: 0.03000000  
R70: 0.03000000  
R71: 0.03000000  
R72: 0.03000000  
R73: 0.03000000  
R74: 0.03000000  
R75: 0.03000000  
R76: 0.03000000  
R77: 0.03000000  
R78: 0.03000000  
R79: 0.03000000  
R80: 0.03000000  
R81: 0.03000000  
R82: 0.03000000  
R83: 0.03000000  
R84: 0.03000000  
R85: 0.03000000  
R86: 0.03000000  
R87: 0.03000000  
R88: 0.03000000  
R89: 0.03000000  
R90: 0.03000000  
R91: 0.03000000  
R92: 0.03000000  
R93: 0.03000000  
R94: 0.03000000  
R95: 0.03000000  
R96: 0.03000000  
R97: 0.03000000  
R98: 0.03000000  
R99: 0.03000000  
R100: 0.03000000

DATA44 NOESYTP / 3CDW  
 21 - 36 : TRJA\* 75000

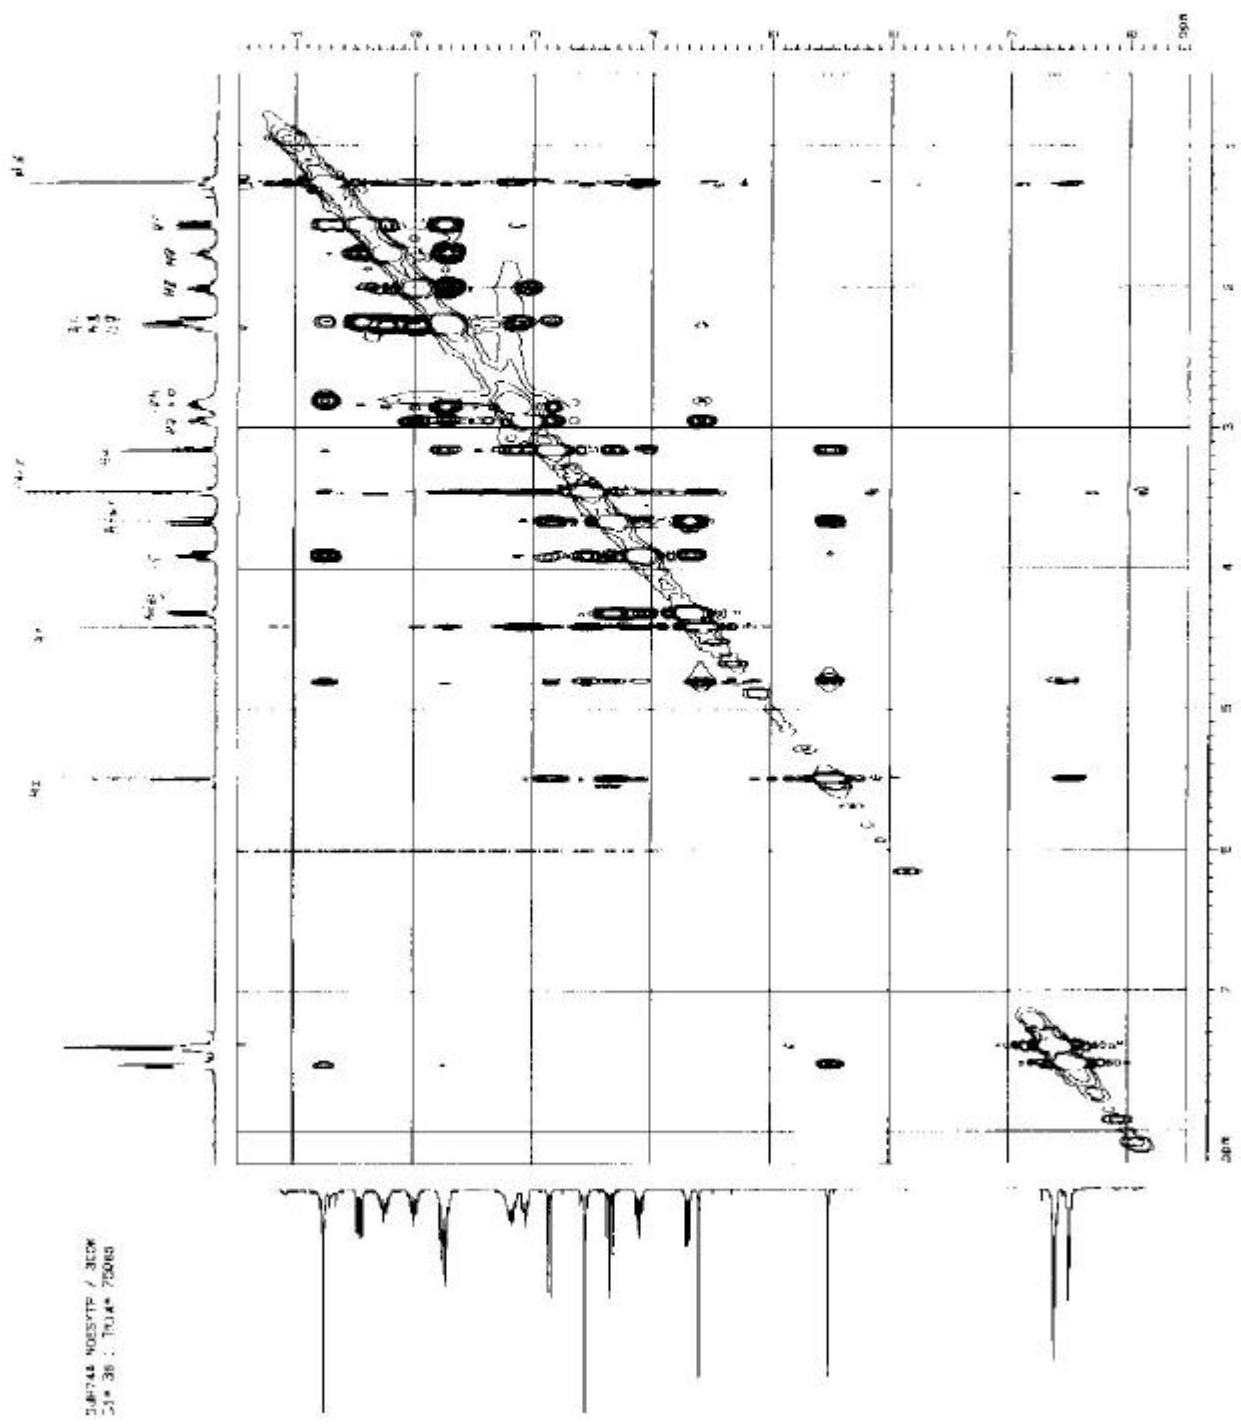

Current Data Parameters  
 NAME : DATA44  
 EXPNO : 1  
 PROCNO : 1  
 DATE\_ : 200608  
 TIME : 14.45  
 INSTRUM : spect  
 PULPROG : zgpg30  
 F2 - Acquisition Parameters  
 SFO1 : 400.133000 MHz  
 SFO2 : 100.626150 MHz  
 AQ : 5.731888 sec  
 RG : 327.500 Hz  
 DQ : 3.000000 sec  
 F2 - Processing Parameters  
 SI : 327.500  
 SF : 400.133000 MHz  
 RG : 327.500  
 DQ : 3.000000 sec  
 F1 - Acquisition Parameters  
 SFO1 : 400.133000 MHz  
 SFO2 : 100.626150 MHz  
 AQ : 5.731888 sec  
 RG : 327.500 Hz  
 DQ : 3.000000 sec  
 F1 - Processing Parameters  
 SI : 327.500  
 SF : 400.133000 MHz  
 RG : 327.500  
 DQ : 3.000000 sec  
 F2 - Acquisition Parameters  
 SFO1 : 400.133000 MHz  
 SFO2 : 100.626150 MHz  
 AQ : 5.731888 sec  
 RG : 327.500 Hz  
 DQ : 3.000000 sec  
 F2 - Processing Parameters  
 SI : 327.500  
 SF : 400.133000 MHz  
 RG : 327.500  
 DQ : 3.000000 sec

7b NOESY



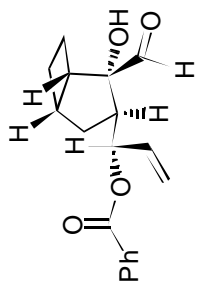

10, proton nmr

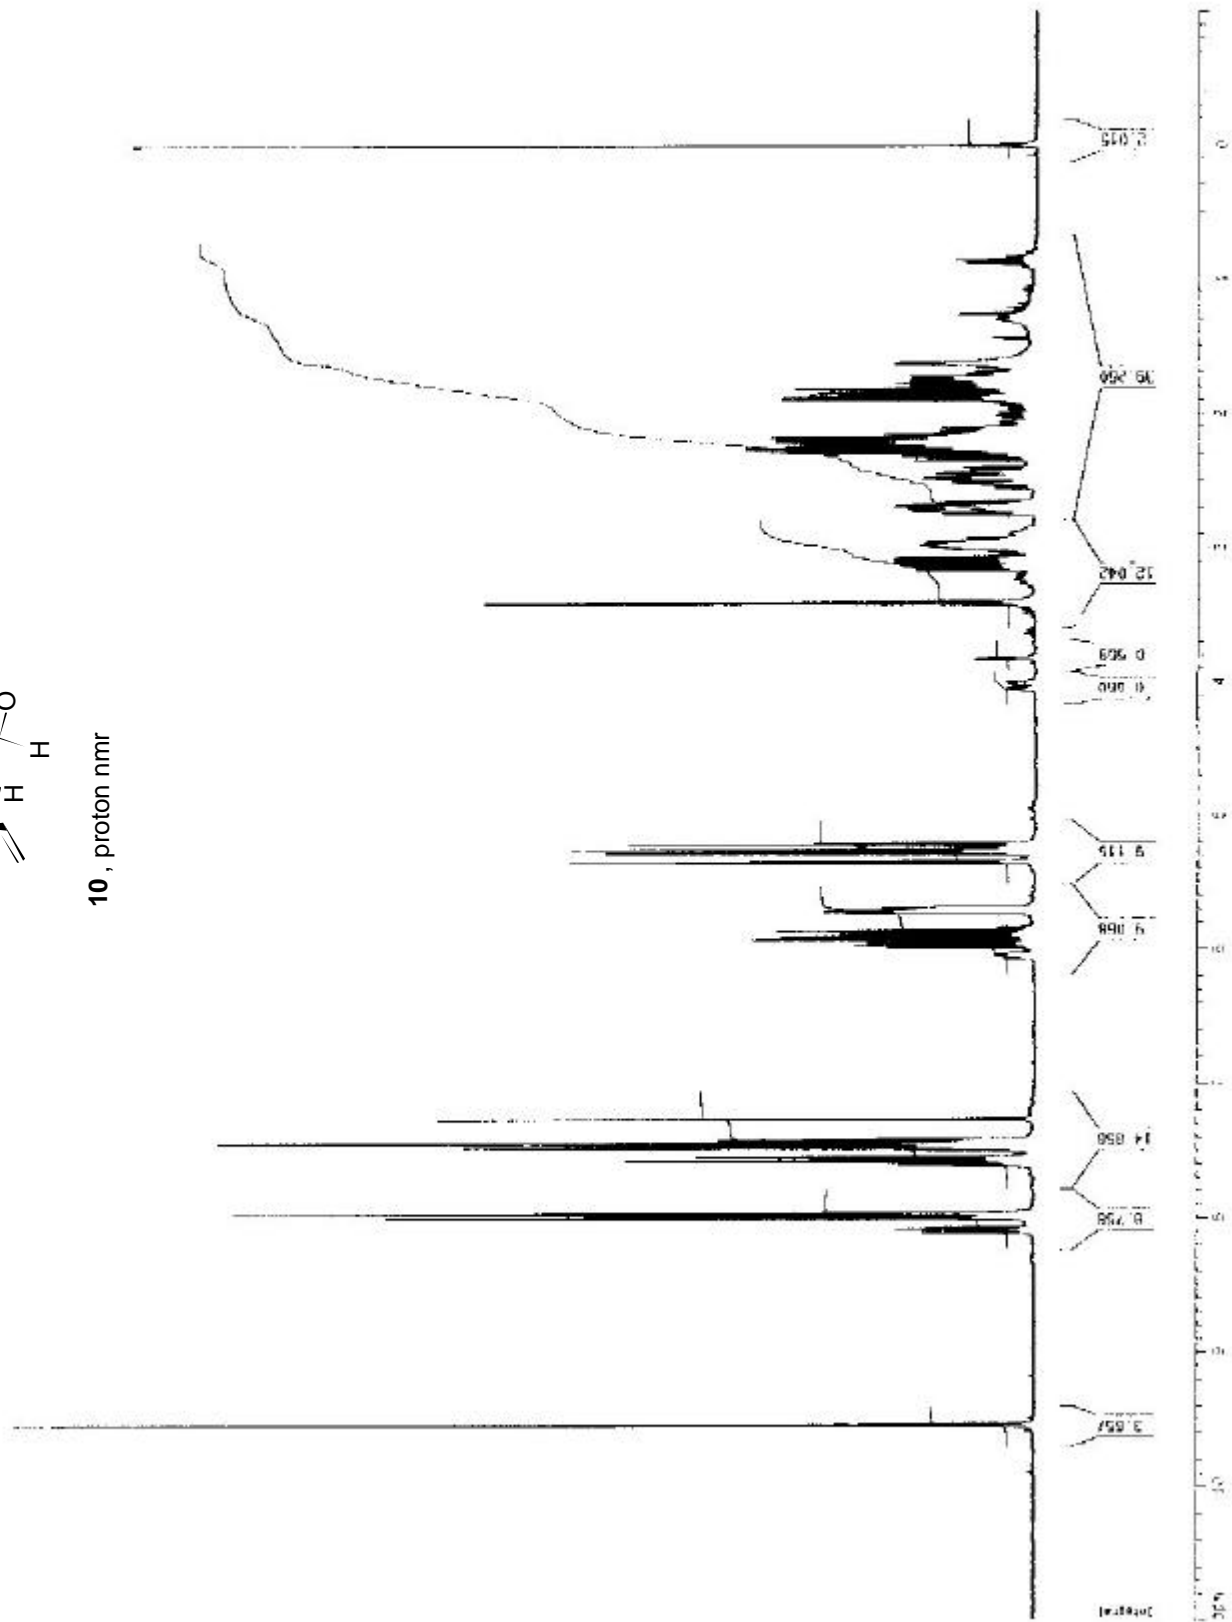

C:\MSDCHEM\10000001\10000001.D  
 F2 - ACQUISITION PARAMETERS  
 NAME 10000001  
 DATE 01-12-01  
 TIME 11:00:00  
 INSTRUMENT spect  
 PULPROG zgpg30  
 TD 65536  
 SFO 400.146  
 AQ 0.327083  
 RG 4096  
 AC 16384  
 DC 327.676  
 DE 1.000000  
 TE 300.2  
 FIDRES 0.000001  
 SCALES 16384  
 SF 1000000.000  
 AQ 0.327083  
 SFO 400.146  
 MDLFB 10000001.D  
 F2 - PROCESSING PARAMETERS  
 SI 32768  
 SF 1000000.000  
 AC 16384  
 DC 327.676  
 RG 4096  
 EN 1  
 ST 1  
 FT 0.327083  
 SC 1  
 SB 1  
 SC 1  
 SD 1  
 SE 1  
 SF 1000000.000  
 SFO 400.146  
 MDLFB 10000001.D  
 C:\MSDCHEM\10000001\10000001.D  
 F2 - ACQUISITION PARAMETERS  
 NAME 10000001  
 DATE 01-12-01  
 TIME 11:00:00  
 INSTRUMENT spect  
 PULPROG zgpg30  
 TD 65536  
 SFO 400.146  
 AQ 0.327083  
 RG 4096  
 AC 16384  
 DC 327.676  
 DE 1.000000  
 TE 300.2  
 FIDRES 0.000001  
 SCALES 16384  
 SF 1000000.000  
 AQ 0.327083  
 SFO 400.146  
 MDLFB 10000001.D  
 F2 - PROCESSING PARAMETERS  
 SI 32768  
 SF 1000000.000  
 AC 16384  
 DC 327.676  
 RG 4096  
 EN 1  
 ST 1  
 FT 0.327083  
 SC 1  
 SB 1  
 SC 1  
 SD 1  
 SE 1  
 SF 1000000.000  
 SFO 400.146  
 MDLFB 10000001.D

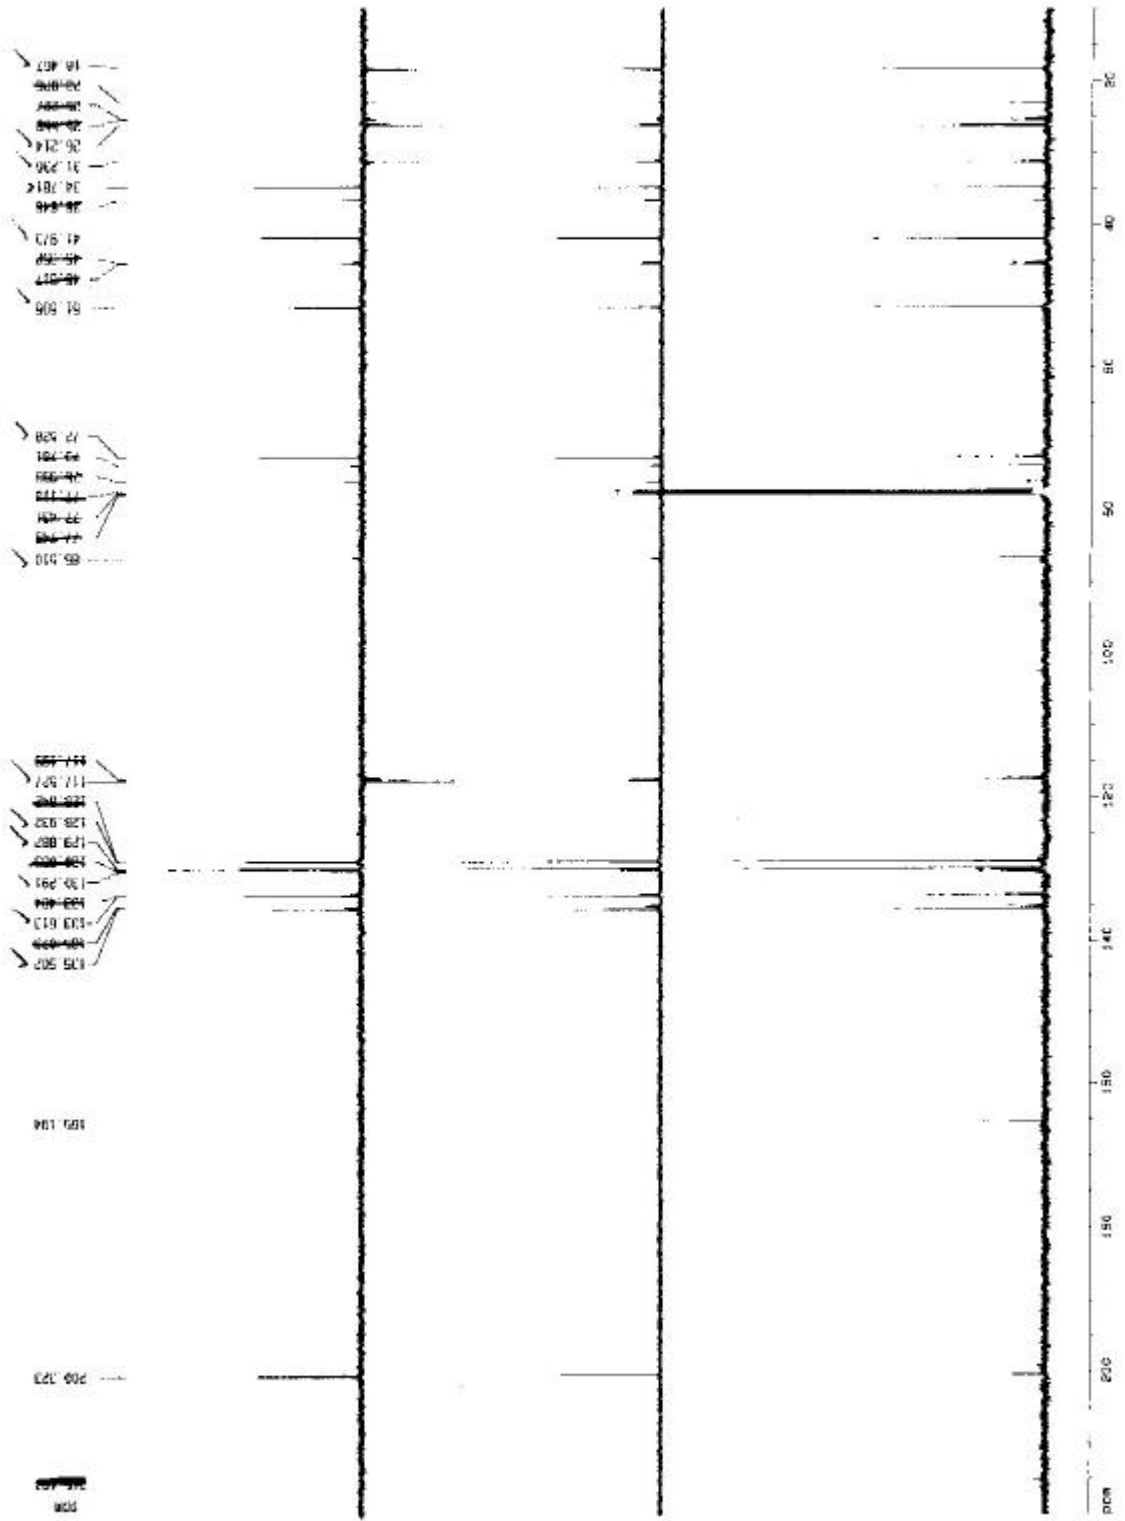

Current Data Parameters

|                             |                |
|-----------------------------|----------------|
| NAME                        | 13CDEPT        |
| EXPNO                       | 1              |
| F2 - Acquisition Parameters |                |
| Date_                       | 08/03/05       |
| Time                        | 10.34          |
| INSTRUM                     | zgpg30         |
| PROBHD                      | 5 mm QNP 1H/13 |
| PULPROG                     | zgpg30         |
| DELTA                       | 0              |
| INVERSI                     | 0              |
| SI                          | 2              |
| RG                          | 327            |
| RG2                         | 327            |
| RG3                         | 327            |
| RG4                         | 327            |
| RG5                         | 327            |
| RG6                         | 327            |
| RG7                         | 327            |
| RG8                         | 327            |
| RG9                         | 327            |
| RG10                        | 327            |
| RG11                        | 327            |
| RG12                        | 327            |
| RG13                        | 327            |
| RG14                        | 327            |
| RG15                        | 327            |
| RG16                        | 327            |
| RG17                        | 327            |
| RG18                        | 327            |
| RG19                        | 327            |
| RG20                        | 327            |
| RG21                        | 327            |
| RG22                        | 327            |
| RG23                        | 327            |
| RG24                        | 327            |
| RG25                        | 327            |
| RG26                        | 327            |
| RG27                        | 327            |
| RG28                        | 327            |
| RG29                        | 327            |
| RG30                        | 327            |
| RG31                        | 327            |
| RG32                        | 327            |
| RG33                        | 327            |
| RG34                        | 327            |
| RG35                        | 327            |
| RG36                        | 327            |
| RG37                        | 327            |
| RG38                        | 327            |
| RG39                        | 327            |
| RG40                        | 327            |
| RG41                        | 327            |
| RG42                        | 327            |
| RG43                        | 327            |
| RG44                        | 327            |
| RG45                        | 327            |
| RG46                        | 327            |
| RG47                        | 327            |
| RG48                        | 327            |
| RG49                        | 327            |
| RG50                        | 327            |
| RG51                        | 327            |
| RG52                        | 327            |
| RG53                        | 327            |
| RG54                        | 327            |
| RG55                        | 327            |
| RG56                        | 327            |
| RG57                        | 327            |
| RG58                        | 327            |
| RG59                        | 327            |
| RG60                        | 327            |
| RG61                        | 327            |
| RG62                        | 327            |
| RG63                        | 327            |
| RG64                        | 327            |
| RG65                        | 327            |
| RG66                        | 327            |
| RG67                        | 327            |
| RG68                        | 327            |
| RG69                        | 327            |
| RG70                        | 327            |
| RG71                        | 327            |
| RG72                        | 327            |
| RG73                        | 327            |
| RG74                        | 327            |
| RG75                        | 327            |
| RG76                        | 327            |
| RG77                        | 327            |
| RG78                        | 327            |
| RG79                        | 327            |
| RG80                        | 327            |
| RG81                        | 327            |
| RG82                        | 327            |
| RG83                        | 327            |
| RG84                        | 327            |
| RG85                        | 327            |
| RG86                        | 327            |
| RG87                        | 327            |
| RG88                        | 327            |
| RG89                        | 327            |
| RG90                        | 327            |
| RG91                        | 327            |
| RG92                        | 327            |
| RG93                        | 327            |
| RG94                        | 327            |
| RG95                        | 327            |
| RG96                        | 327            |
| RG97                        | 327            |
| RG98                        | 327            |
| RG99                        | 327            |
| RG100                       | 327            |
| RG101                       | 327            |
| RG102                       | 327            |
| RG103                       | 327            |
| RG104                       | 327            |
| RG105                       | 327            |
| RG106                       | 327            |
| RG107                       | 327            |
| RG108                       | 327            |
| RG109                       | 327            |
| RG110                       | 327            |
| RG111                       | 327            |
| RG112                       | 327            |
| RG113                       | 327            |
| RG114                       | 327            |
| RG115                       | 327            |
| RG116                       | 327            |
| RG117                       | 327            |
| RG118                       | 327            |
| RG119                       | 327            |
| RG120                       | 327            |
| RG121                       | 327            |
| RG122                       | 327            |
| RG123                       | 327            |
| RG124                       | 327            |
| RG125                       | 327            |
| RG126                       | 327            |
| RG127                       | 327            |
| RG128                       | 327            |
| RG129                       | 327            |
| RG130                       | 327            |
| RG131                       | 327            |
| RG132                       | 327            |
| RG133                       | 327            |
| RG134                       | 327            |
| RG135                       | 327            |
| RG136                       | 327            |
| RG137                       | 327            |
| RG138                       | 327            |
| RG139                       | 327            |
| RG140                       | 327            |
| RG141                       | 327            |
| RG142                       | 327            |
| RG143                       | 327            |
| RG144                       | 327            |
| RG145                       | 327            |
| RG146                       | 327            |
| RG147                       | 327            |
| RG148                       | 327            |
| RG149                       | 327            |
| RG150                       | 327            |
| RG151                       | 327            |
| RG152                       | 327            |
| RG153                       | 327            |
| RG154                       | 327            |
| RG155                       | 327            |
| RG156                       | 327            |
| RG157                       | 327            |
| RG158                       | 327            |
| RG159                       | 327            |
| RG160                       | 327            |
| RG161                       | 327            |
| RG162                       | 327            |
| RG163                       | 327            |
| RG164                       | 327            |
| RG165                       | 327            |
| RG166                       | 327            |
| RG167                       | 327            |
| RG168                       | 327            |
| RG169                       | 327            |
| RG170                       | 327            |
| RG171                       | 327            |
| RG172                       | 327            |
| RG173                       | 327            |
| RG174                       | 327            |
| RG175                       | 327            |
| RG176                       | 327            |
| RG177                       | 327            |
| RG178                       | 327            |
| RG179                       | 327            |
| RG180                       | 327            |
| RG181                       | 327            |
| RG182                       | 327            |
| RG183                       | 327            |
| RG184                       | 327            |
| RG185                       | 327            |
| RG186                       | 327            |
| RG187                       | 327            |
| RG188                       | 327            |
| RG189                       | 327            |
| RG190                       | 327            |
| RG191                       | 327            |
| RG192                       | 327            |
| RG193                       | 327            |
| RG194                       | 327            |
| RG195                       | 327            |
| RG196                       | 327            |
| RG197                       | 327            |
| RG198                       | 327            |
| RG199                       | 327            |
| RG200                       | 327            |
| RG201                       | 327            |
| RG202                       | 327            |
| RG203                       | 327            |
| RG204                       | 327            |
| RG205                       | 327            |
| RG206                       | 327            |
| RG207                       | 327            |
| RG208                       | 327            |
| RG209                       | 327            |
| RG210                       | 327            |
| RG211                       | 327            |
| RG212                       | 327            |
| RG213                       | 327            |
| RG214                       | 327            |
| RG215                       | 327            |
| RG216                       | 327            |
| RG217                       | 327            |
| RG218                       | 327            |
| RG219                       | 327            |
| RG220                       | 327            |
| RG221                       | 327            |
| RG222                       | 327            |
| RG223                       | 327            |
| RG224                       | 327            |
| RG225                       | 327            |
| RG226                       | 327            |
| RG227                       | 327            |
| RG228                       | 327            |
| RG229                       | 327            |
| RG230                       | 327            |
| RG231                       | 327            |
| RG232                       | 327            |
| RG233                       | 327            |
| RG234                       | 327            |
| RG235                       | 327            |
| RG236                       | 327            |
| RG237                       | 327            |
| RG238                       | 327            |
| RG239                       | 327            |
| RG240                       | 327            |
| RG241                       | 327            |
| RG242                       | 327            |
| RG243                       | 327            |
| RG244                       | 327            |
| RG245                       | 327            |
| RG246                       | 327            |
| RG247                       | 327            |
| RG248                       | 327            |
| RG249                       | 327            |
| RG250                       | 327            |
| RG251                       | 327            |
| RG252                       | 327            |
| RG253                       | 327            |
| RG254                       | 327            |
| RG255                       | 327            |
| RG256                       | 327            |
| RG257                       | 327            |
| RG258                       | 327            |
| RG259                       | 327            |
| RG260                       | 327            |
| RG261                       | 327            |
| RG262                       | 327            |
| RG263                       | 327            |
| RG264                       | 327            |
| RG265                       | 327            |
| RG266                       | 327            |
| RG267                       | 327            |
| RG268                       | 327            |
| RG269                       | 327            |
| RG270                       | 327            |
| RG271                       | 327            |
| RG272                       | 327            |
| RG273                       | 327            |
| RG274                       | 327            |
| RG275                       | 327            |
| RG276                       | 327            |
| RG277                       | 327            |
| RG278                       | 327            |
| RG279                       | 327            |
| RG280                       | 327            |
| RG281                       | 327            |
| RG282                       | 327            |
| RG283                       | 327            |
| RG284                       | 327            |
| RG285                       | 327            |
| RG286                       | 327            |
| RG287                       | 327            |
| RG288                       | 327            |
| RG289                       | 327            |
| RG290                       | 327            |
| RG291                       | 327            |
| RG292                       | 327            |
| RG293                       | 327            |
| RG294                       | 327            |
| RG295                       | 327            |
| RG296                       | 327            |
| RG297                       | 327            |
| RG298                       | 327            |
| RG299                       | 327            |
| RG300                       | 327            |
| RG301                       | 327            |
| RG302                       | 327            |
| RG303                       | 327            |
| RG304                       | 327            |
| RG305                       | 327            |
| RG306                       | 327            |
| RG307                       | 327            |
| RG308                       | 327            |
| RG309                       | 327            |
| RG310                       | 327            |
| RG311                       | 327            |
| RG312                       | 327            |
| RG313                       | 327            |
| RG314                       | 327            |
| RG315                       | 327            |
| RG316                       | 327            |
| RG317                       | 327            |
| RG318                       | 327            |
| RG319                       | 327            |
| RG320                       | 327            |
| RG321                       | 327            |
| RG322                       | 327            |
| RG323                       | 327            |
| RG324                       | 327            |
| RG325                       | 327            |
| RG326                       | 327            |
| RG327                       | 327            |
| RG328                       | 327            |
| RG329                       | 327            |
| RG330                       | 327            |
| RG331                       | 327            |
| RG332                       | 327            |
| RG333                       | 327            |
| RG334                       | 327            |
| RG335                       | 327            |
| RG336                       | 327            |
| RG337                       | 327            |
| RG338                       | 327            |
| RG339                       | 327            |
| RG340                       | 327            |
| RG341                       | 327            |
| RG342                       | 327            |
| RG343                       | 327            |
| RG344                       | 327            |
| RG345                       | 327            |
| RG346                       | 327            |
| RG347                       | 327            |
| RG348                       | 327            |
| RG349                       | 327            |
| RG350                       | 327            |
| RG351                       | 327            |
| RG352                       | 327            |
| RG353                       | 327            |
| RG354                       | 327            |
| RG355                       | 327            |
| RG356                       | 327            |
| RG357                       | 327            |
| RG358                       | 327            |
| RG359                       | 327            |
| RG360                       | 327            |
| RG361                       | 327            |
| RG362                       | 327            |
| RG363                       | 327            |
| RG364                       | 327            |
| RG365                       | 327            |
| RG366                       | 327            |
| RG367                       | 327            |
| RG368                       | 327            |
| RG369                       | 327            |
| RG370                       | 327            |
| RG371                       | 327            |
| RG372                       | 327            |
| RG373                       | 327            |
| RG374                       | 327            |
| RG375                       | 327            |
| RG376                       | 327            |
| RG377                       | 327            |
| RG378                       | 327            |
| RG379                       | 327            |
| RG380                       | 327            |
| RG381                       | 327            |
| RG382                       | 327            |
| RG383                       | 327            |
| RG384                       | 327            |
| RG385                       | 327            |
| RG386                       | 327            |
| RG387                       | 327            |
| RG388                       | 327            |
| RG389                       | 327            |
| RG390                       | 327            |
| RG391                       | 327            |
| RG392                       | 327            |
| RG393                       | 327            |
| RG394                       | 327            |
| RG395                       | 327            |
| RG396                       | 327            |
| RG397                       | 327            |
| RG398                       | 327            |
| RG399                       | 327            |
| RG400                       | 327            |
| RG401                       | 327            |
| RG402                       | 327            |
| RG403                       | 327            |
| RG404                       | 327            |
| RG405                       | 327            |
| RG406                       | 327            |
| RG407                       | 327            |
| RG408                       | 327            |
| RG409                       | 327            |
| RG410                       | 327            |
| RG411                       | 327            |
| RG412                       | 327            |
| RG413                       | 327            |
| RG414                       | 327            |
| RG415                       | 327            |
| RG416                       | 327            |
| RG417                       | 327            |
| RG418                       | 327            |
| RG419                       | 327            |
| RG420                       | 327            |
| RG421                       | 327            |
| RG422                       | 327            |
| RG423                       | 327            |
| RG424                       | 327            |
| RG425                       | 327            |
| RG426                       | 327            |
| RG427                       | 327            |
| RG428                       | 327            |
| RG429                       | 327            |
| RG430                       | 327            |
| RG431                       | 327            |
| RG432                       | 327            |
| RG433                       | 327            |
| RG434                       | 327            |
| RG435                       | 327            |
| RG436                       | 327            |
| RG437                       | 327            |
| RG438                       | 327            |
| RG439                       | 327            |
| RG440                       | 327            |
| RG441                       | 327            |
| RG442                       | 327            |
| RG443                       | 327            |
| RG444                       | 327            |
| RG445                       | 327            |
| RG446                       | 327            |
| RG447                       | 327            |
| RG448                       | 327            |
| RG449                       | 327            |
| RG450                       | 327            |
| RG451                       | 327            |
| RG452                       | 327            |
| RG453                       | 327            |
| RG454                       | 327            |
| RG455                       | 327            |
| RG456                       | 327            |
| RG457                       | 327            |
| RG458                       | 327            |
| RG459                       | 327            |
| RG460                       | 327            |
| RG461                       | 327            |
| RG462                       | 327            |
| RG463                       | 327            |
| RG464                       | 327            |
| RG465                       | 327            |
| RG466                       | 327            |
| RG467                       | 327            |
| RG468                       | 327            |
| RG469                       | 327            |
| RG470                       | 327            |
| RG471                       | 327            |
| RG472                       | 327            |
| RG473                       | 327            |
| RG474                       | 327            |
| RG475                       | 327            |
| RG476                       | 327            |
| RG477                       | 327            |
| RG478                       | 327            |
| RG479                       | 327            |
| RG480                       | 327            |
| RG481                       | 327            |
| RG482                       | 327            |
| RG483                       | 327            |
| RG484                       | 327            |
| RG485                       | 327            |
| RG486                       | 327            |
| RG487                       | 327            |
| RG488                       | 327            |
| RG489                       | 327            |
| RG490                       | 327            |
| RG491                       | 327            |
| RG492                       | 327            |
| RG493                       | 327            |
| RG494                       | 327            |
| RG495                       | 327            |
| RG496                       | 327            |
| RG497                       | 327            |
| RG498                       | 327            |
| RG499                       | 327            |
| RG500                       | 327            |
| RG501                       | 327            |
| RG502                       | 327            |
| RG503                       | 327            |
| RG504                       | 327            |
| RG505                       | 327            |
| RG506                       | 327            |
| RG507                       | 327            |
| RG508                       | 327            |
| RG509                       | 327            |
| RG510                       | 327            |
| RG511                       | 327            |
| RG512                       | 327            |
| RG513                       | 327            |
| RG514                       | 327            |
| RG515                       | 327            |
| RG516                       | 327            |
| RG517                       | 327            |
| RG518                       | 327            |
| RG519                       | 327            |
| RG520                       | 327            |
| RG521                       | 327            |
| RG522                       | 3              |



CJ-98C 13C (1H) + DEPT 135 / 300K

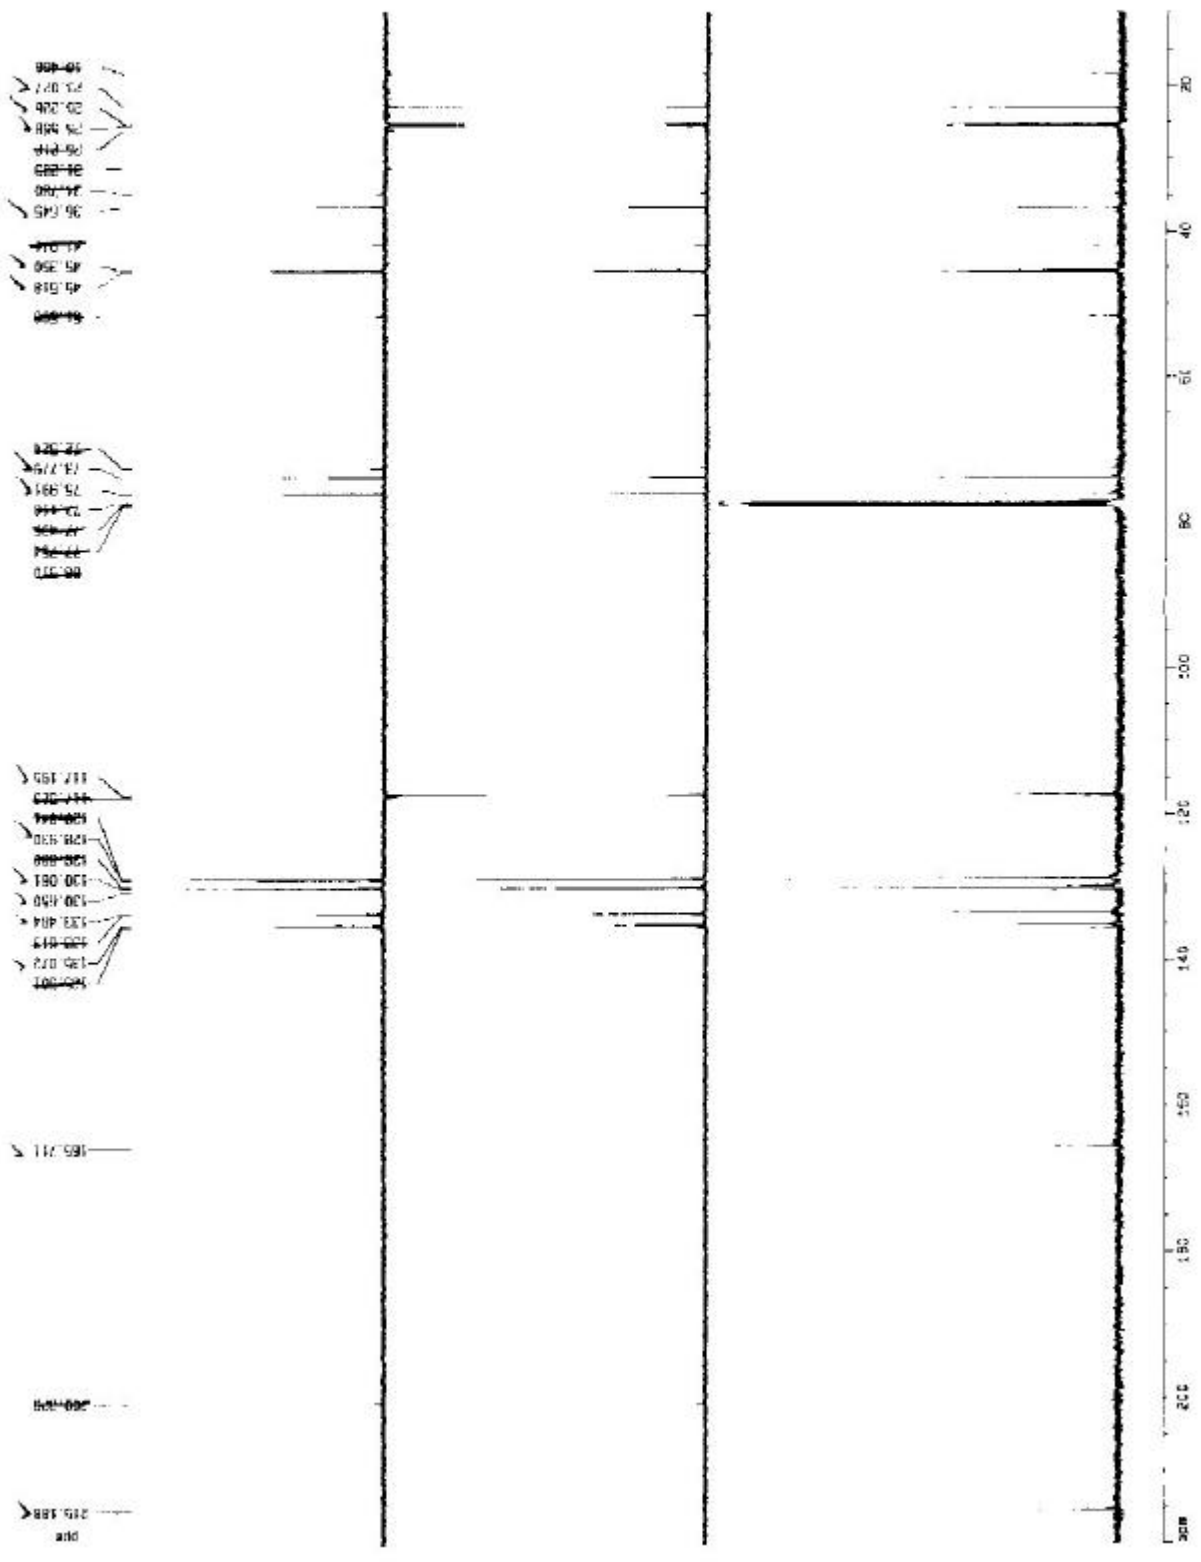

Current Data Parameters  
 NAME CJ-98C  
 EXPGM 4.1.362  
 PROCNO 1

29 - Acquisition Parameters  
 Date\_ 06/01/03  
 Time 11:35  
 INSTRUM spect  
 PULPROG zgpg30  
 ALPHAC 0.00000000  
 SOLVENT CDCl3  
 NS 512  
 DS 4  
 SWH 20246.548 Hz  
 FIDRES 0.862078 Hz  
 AQ 0.3801436 sec  
 RG 2048  
 DM 17.701 MHz  
 SFO 500.136261 MHz  
 FE 300.136

31 - Processing parameters  
 SI 32768  
 SF 500.136261 MHz  
 WDW EM  
 SSB 0  
 GB 0  
 PC 1.03 Hz  
 SC 3  
 RC 1.40

32 - NMR Data Parameters  
 CH 21.03 CH  
 CH2 22.03 CH2  
 CH3 23.03 CH3  
 CD 15.00 CD  
 CD2 16.00 CD2  
 CD3 17.00 CD3  
 CD4 18.00 CD4  
 CD5 19.00 CD5  
 CD6 20.00 CD6  
 CD7 21.00 CD7  
 CD8 22.00 CD8  
 CD9 23.00 CD9  
 CD10 24.00 CD10  
 CD11 25.00 CD11  
 CD12 26.00 CD12  
 CD13 27.00 CD13  
 CD14 28.00 CD14  
 CD15 29.00 CD15  
 CD16 30.00 CD16  
 CD17 31.00 CD17  
 CD18 32.00 CD18  
 CD19 33.00 CD19  
 CD20 34.00 CD20  
 CD21 35.00 CD21  
 CD22 36.00 CD22  
 CD23 37.00 CD23  
 CD24 38.00 CD24  
 CD25 39.00 CD25  
 CD26 40.00 CD26  
 CD27 41.00 CD27  
 CD28 42.00 CD28  
 CD29 43.00 CD29  
 CD30 44.00 CD30  
 CD31 45.00 CD31  
 CD32 46.00 CD32  
 CD33 47.00 CD33  
 CD34 48.00 CD34  
 CD35 49.00 CD35  
 CD36 50.00 CD36  
 CD37 51.00 CD37  
 CD38 52.00 CD38  
 CD39 53.00 CD39  
 CD40 54.00 CD40  
 CD41 55.00 CD41  
 CD42 56.00 CD42  
 CD43 57.00 CD43  
 CD44 58.00 CD44  
 CD45 59.00 CD45  
 CD46 60.00 CD46  
 CD47 61.00 CD47  
 CD48 62.00 CD48  
 CD49 63.00 CD49  
 CD50 64.00 CD50  
 CD51 65.00 CD51  
 CD52 66.00 CD52  
 CD53 67.00 CD53  
 CD54 68.00 CD54  
 CD55 69.00 CD55  
 CD56 70.00 CD56  
 CD57 71.00 CD57  
 CD58 72.00 CD58  
 CD59 73.00 CD59  
 CD60 74.00 CD60  
 CD61 75.00 CD61  
 CD62 76.00 CD62  
 CD63 77.00 CD63  
 CD64 78.00 CD64  
 CD65 79.00 CD65  
 CD66 80.00 CD66  
 CD67 81.00 CD67  
 CD68 82.00 CD68  
 CD69 83.00 CD69  
 CD70 84.00 CD70  
 CD71 85.00 CD71  
 CD72 86.00 CD72  
 CD73 87.00 CD73  
 CD74 88.00 CD74  
 CD75 89.00 CD75  
 CD76 90.00 CD76  
 CD77 91.00 CD77  
 CD78 92.00 CD78  
 CD79 93.00 CD79  
 CD80 94.00 CD80  
 CD81 95.00 CD81  
 CD82 96.00 CD82  
 CD83 97.00 CD83  
 CD84 98.00 CD84  
 CD85 99.00 CD85  
 CD86 100.00 CD86  
 CD87 101.00 CD87  
 CD88 102.00 CD88  
 CD89 103.00 CD89  
 CD90 104.00 CD90  
 CD91 105.00 CD91  
 CD92 106.00 CD92  
 CD93 107.00 CD93  
 CD94 108.00 CD94  
 CD95 109.00 CD95  
 CD96 110.00 CD96  
 CD97 111.00 CD97  
 CD98 112.00 CD98  
 CD99 113.00 CD99  
 CD100 114.00 CD100  
 CD101 115.00 CD101  
 CD102 116.00 CD102  
 CD103 117.00 CD103  
 CD104 118.00 CD104  
 CD105 119.00 CD105  
 CD106 120.00 CD106  
 CD107 121.00 CD107  
 CD108 122.00 CD108  
 CD109 123.00 CD109  
 CD110 124.00 CD110  
 CD111 125.00 CD111  
 CD112 126.00 CD112  
 CD113 127.00 CD113  
 CD114 128.00 CD114  
 CD115 129.00 CD115  
 CD116 130.00 CD116  
 CD117 131.00 CD117  
 CD118 132.00 CD118  
 CD119 133.00 CD119  
 CD120 134.00 CD120  
 CD121 135.00 CD121  
 CD122 136.00 CD122  
 CD123 137.00 CD123  
 CD124 138.00 CD124  
 CD125 139.00 CD125  
 CD126 140.00 CD126  
 CD127 141.00 CD127  
 CD128 142.00 CD128  
 CD129 143.00 CD129  
 CD130 144.00 CD130  
 CD131 145.00 CD131  
 CD132 146.00 CD132  
 CD133 147.00 CD133  
 CD134 148.00 CD134  
 CD135 149.00 CD135  
 CD136 150.00 CD136  
 CD137 151.00 CD137  
 CD138 152.00 CD138  
 CD139 153.00 CD139  
 CD140 154.00 CD140  
 CD141 155.00 CD141  
 CD142 156.00 CD142  
 CD143 157.00 CD143  
 CD144 158.00 CD144  
 CD145 159.00 CD145  
 CD146 160.00 CD146  
 CD147 161.00 CD147  
 CD148 162.00 CD148  
 CD149 163.00 CD149  
 CD150 164.00 CD150  
 CD151 165.00 CD151  
 CD152 166.00 CD152  
 CD153 167.00 CD153  
 CD154 168.00 CD154  
 CD155 169.00 CD155  
 CD156 170.00 CD156  
 CD157 171.00 CD157  
 CD158 172.00 CD158  
 CD159 173.00 CD159  
 CD160 174.00 CD160  
 CD161 175.00 CD161  
 CD162 176.00 CD162  
 CD163 177.00 CD163  
 CD164 178.00 CD164  
 CD165 179.00 CD165  
 CD166 180.00 CD166  
 CD167 181.00 CD167  
 CD168 182.00 CD168  
 CD169 183.00 CD169  
 CD170 184.00 CD170  
 CD171 185.00 CD171  
 CD172 186.00 CD172  
 CD173 187.00 CD173  
 CD174 188.00 CD174  
 CD175 189.00 CD175  
 CD176 190.00 CD176  
 CD177 191.00 CD177  
 CD178 192.00 CD178  
 CD179 193.00 CD179  
 CD180 194.00 CD180  
 CD181 195.00 CD181  
 CD182 196.00 CD182  
 CD183 197.00 CD183  
 CD184 198.00 CD184  
 CD185 199.00 CD185  
 CD186 200.00 CD186

12, <sup>13</sup>C and DEPT



Current Data Parameters  
 01/17/82  
 1

14 - ACQUISITION PARAMETERS

Date: 01/17/82  
 Time: 13:14  
 INSTRUM: CPD  
 CHANNEL: 1  
 PULPROG: zgpg30  
 TO SOLVENT: CDCl3  
 NS: 4  
 DS: 16  
 SWH: 4134.881 Hz  
 F1 F2: 2 CHANNELS  
 AQ: 0.00000000 sec  
 SFO: 125.760 MHz  
 DE: 11.37000000 sec  
 TE: 4.20000000 sec  
 TD: 300.00000000  
 GB: 0.00000000 sec  
 PC: 0.00000000 sec  
 CB: 0.00000000 sec  
 DB: 0.00000000 sec  
 EB: 0.00000000 sec  
 HB: 0.00000000 sec  
 IC: 0.00000000 sec  
 EC: 0.00000000 sec  
 FC: 0.00000000 sec  
 GC: 0.00000000 sec  
 HC: 0.00000000 sec  
 IC: 0.00000000 sec  
 JC: 0.00000000 sec  
 KC: 0.00000000 sec  
 LC: 0.00000000 sec  
 MC: 0.00000000 sec  
 NC: 0.00000000 sec  
 OC: 0.00000000 sec  
 PC: 0.00000000 sec  
 QC: 0.00000000 sec  
 RC: 0.00000000 sec  
 SC: 0.00000000 sec  
 TC: 0.00000000 sec  
 UC: 0.00000000 sec  
 VC: 0.00000000 sec  
 WC: 0.00000000 sec  
 XC: 0.00000000 sec  
 YC: 0.00000000 sec  
 ZC: 0.00000000 sec

15 - PROCESSING PARAMETERS

SI: 16384  
 SF: 125.760000 MHz  
 SP: 3.00 Hz  
 AS: 32768  
 EQ: 0.5 Hz  
 GE: 0.5 Hz  
 GR: 0.5 Hz  
 GC: 0.00 Hz  
 GD: 0.00 Hz  
 GE: 0.00 Hz  
 GF: 0.00 Hz  
 GG: 0.00 Hz  
 GH: 0.00 Hz  
 GI: 0.00 Hz  
 GJ: 0.00 Hz  
 GK: 0.00 Hz  
 GL: 0.00 Hz  
 GM: 0.00 Hz  
 GN: 0.00 Hz  
 GO: 0.00 Hz  
 GP: 0.00 Hz  
 GQ: 0.00 Hz  
 GR: 0.00 Hz  
 GS: 0.00 Hz  
 GT: 0.00 Hz  
 GU: 0.00 Hz  
 GV: 0.00 Hz  
 GW: 0.00 Hz  
 GX: 0.00 Hz  
 GY: 0.00 Hz  
 GZ: 0.00 Hz  
 HA: 0.00 Hz  
 HB: 0.00 Hz  
 HC: 0.00 Hz  
 HD: 0.00 Hz  
 HE: 0.00 Hz  
 HF: 0.00 Hz  
 HG: 0.00 Hz  
 HH: 0.00 Hz  
 HI: 0.00 Hz  
 HJ: 0.00 Hz  
 HK: 0.00 Hz  
 HL: 0.00 Hz  
 HM: 0.00 Hz  
 HN: 0.00 Hz  
 HO: 0.00 Hz  
 HP: 0.00 Hz  
 HQ: 0.00 Hz  
 HR: 0.00 Hz  
 HS: 0.00 Hz  
 HT: 0.00 Hz  
 HU: 0.00 Hz  
 HV: 0.00 Hz  
 HW: 0.00 Hz  
 HX: 0.00 Hz  
 HY: 0.00 Hz  
 HZ: 0.00 Hz  
 IA: 0.00 Hz  
 IB: 0.00 Hz  
 IC: 0.00 Hz  
 ID: 0.00 Hz  
 IE: 0.00 Hz  
 IF: 0.00 Hz  
 IG: 0.00 Hz  
 IH: 0.00 Hz  
 II: 0.00 Hz  
 IJ: 0.00 Hz  
 IK: 0.00 Hz  
 IL: 0.00 Hz  
 IM: 0.00 Hz  
 IN: 0.00 Hz  
 IO: 0.00 Hz  
 IP: 0.00 Hz  
 IQ: 0.00 Hz  
 IR: 0.00 Hz  
 IS: 0.00 Hz  
 IT: 0.00 Hz  
 IU: 0.00 Hz  
 IV: 0.00 Hz  
 IW: 0.00 Hz  
 IX: 0.00 Hz  
 IY: 0.00 Hz  
 IZ: 0.00 Hz  
 JA: 0.00 Hz  
 JB: 0.00 Hz  
 JC: 0.00 Hz  
 JD: 0.00 Hz  
 JE: 0.00 Hz  
 JF: 0.00 Hz  
 JG: 0.00 Hz  
 JH: 0.00 Hz  
 JI: 0.00 Hz  
 JJ: 0.00 Hz  
 JK: 0.00 Hz  
 JL: 0.00 Hz  
 JM: 0.00 Hz  
 JN: 0.00 Hz  
 JO: 0.00 Hz  
 JP: 0.00 Hz  
 JQ: 0.00 Hz  
 JR: 0.00 Hz  
 JS: 0.00 Hz  
 JT: 0.00 Hz  
 JU: 0.00 Hz  
 JV: 0.00 Hz  
 JW: 0.00 Hz  
 JX: 0.00 Hz  
 JY: 0.00 Hz  
 JZ: 0.00 Hz  
 KA: 0.00 Hz  
 KB: 0.00 Hz  
 KC: 0.00 Hz  
 KD: 0.00 Hz  
 KE: 0.00 Hz  
 KF: 0.00 Hz  
 KG: 0.00 Hz  
 KH: 0.00 Hz  
 KI: 0.00 Hz  
 KJ: 0.00 Hz  
 KK: 0.00 Hz  
 KL: 0.00 Hz  
 KM: 0.00 Hz  
 KN: 0.00 Hz  
 KO: 0.00 Hz  
 KP: 0.00 Hz  
 KQ: 0.00 Hz  
 KR: 0.00 Hz  
 KS: 0.00 Hz  
 KT: 0.00 Hz  
 KU: 0.00 Hz  
 KV: 0.00 Hz  
 KW: 0.00 Hz  
 KX: 0.00 Hz  
 KY: 0.00 Hz  
 KZ: 0.00 Hz  
 LA: 0.00 Hz  
 LB: 0.00 Hz  
 LC: 0.00 Hz  
 LD: 0.00 Hz  
 LE: 0.00 Hz  
 LF: 0.00 Hz  
 LG: 0.00 Hz  
 LH: 0.00 Hz  
 LI: 0.00 Hz  
 LJ: 0.00 Hz  
 LK: 0.00 Hz  
 LL: 0.00 Hz  
 LM: 0.00 Hz  
 LN: 0.00 Hz  
 LO: 0.00 Hz  
 LP: 0.00 Hz  
 LQ: 0.00 Hz  
 LR: 0.00 Hz  
 LS: 0.00 Hz  
 LT: 0.00 Hz  
 LU: 0.00 Hz  
 LV: 0.00 Hz  
 LW: 0.00 Hz  
 LX: 0.00 Hz  
 LY: 0.00 Hz  
 LZ: 0.00 Hz  
 MA: 0.00 Hz  
 MB: 0.00 Hz  
 MC: 0.00 Hz  
 MD: 0.00 Hz  
 ME: 0.00 Hz  
 MF: 0.00 Hz  
 MG: 0.00 Hz  
 MH: 0.00 Hz  
 MI: 0.00 Hz  
 MJ: 0.00 Hz  
 MK: 0.00 Hz  
 ML: 0.00 Hz  
 MM: 0.00 Hz  
 MN: 0.00 Hz  
 MO: 0.00 Hz  
 MP: 0.00 Hz  
 MQ: 0.00 Hz  
 MR: 0.00 Hz  
 MS: 0.00 Hz  
 MT: 0.00 Hz  
 MU: 0.00 Hz  
 MV: 0.00 Hz  
 MW: 0.00 Hz  
 MX: 0.00 Hz  
 MY: 0.00 Hz  
 MZ: 0.00 Hz  
 NA: 0.00 Hz  
 NB: 0.00 Hz  
 NC: 0.00 Hz  
 ND: 0.00 Hz  
 NE: 0.00 Hz  
 NF: 0.00 Hz  
 NG: 0.00 Hz  
 NH: 0.00 Hz  
 NI: 0.00 Hz  
 NJ: 0.00 Hz  
 NK: 0.00 Hz  
 NL: 0.00 Hz  
 NM: 0.00 Hz  
 NN: 0.00 Hz  
 NO: 0.00 Hz  
 NP: 0.00 Hz  
 NQ: 0.00 Hz  
 NR: 0.00 Hz  
 NS: 0.00 Hz  
 NT: 0.00 Hz  
 NU: 0.00 Hz  
 NV: 0.00 Hz  
 NW: 0.00 Hz  
 NX: 0.00 Hz  
 NY: 0.00 Hz  
 NZ: 0.00 Hz  
 OA: 0.00 Hz  
 OB: 0.00 Hz  
 OC: 0.00 Hz  
 OD: 0.00 Hz  
 OE: 0.00 Hz  
 OF: 0.00 Hz  
 OG: 0.00 Hz  
 OH: 0.00 Hz  
 OI: 0.00 Hz  
 OJ: 0.00 Hz  
 OK: 0.00 Hz  
 OL: 0.00 Hz  
 OM: 0.00 Hz  
 ON: 0.00 Hz  
 OO: 0.00 Hz  
 OP: 0.00 Hz  
 OQ: 0.00 Hz  
 OR: 0.00 Hz  
 OS: 0.00 Hz  
 OT: 0.00 Hz  
 OU: 0.00 Hz  
 OV: 0.00 Hz  
 OW: 0.00 Hz  
 OX: 0.00 Hz  
 OY: 0.00 Hz  
 OZ: 0.00 Hz  
 PA: 0.00 Hz  
 PB: 0.00 Hz  
 PC: 0.00 Hz  
 PD: 0.00 Hz  
 PE: 0.00 Hz  
 PF: 0.00 Hz  
 PG: 0.00 Hz  
 PH: 0.00 Hz  
 PI: 0.00 Hz  
 PJ: 0.00 Hz  
 PK: 0.00 Hz  
 PL: 0.00 Hz  
 PM: 0.00 Hz  
 PN: 0.00 Hz  
 PO: 0.00 Hz  
 PP: 0.00 Hz  
 PQ: 0.00 Hz  
 PR: 0.00 Hz  
 PS: 0.00 Hz  
 PT: 0.00 Hz  
 PU: 0.00 Hz  
 PV: 0.00 Hz  
 PW: 0.00 Hz  
 PX: 0.00 Hz  
 PY: 0.00 Hz  
 PZ: 0.00 Hz  
 QA: 0.00 Hz  
 QB: 0.00 Hz  
 QC: 0.00 Hz  
 QD: 0.00 Hz  
 QE: 0.00 Hz  
 QF: 0.00 Hz  
 QG: 0.00 Hz  
 QH: 0.00 Hz  
 QI: 0.00 Hz  
 QJ: 0.00 Hz  
 QK: 0.00 Hz  
 QL: 0.00 Hz  
 QM: 0.00 Hz  
 QN: 0.00 Hz  
 QO: 0.00 Hz  
 QP: 0.00 Hz  
 QQ: 0.00 Hz  
 QR: 0.00 Hz  
 QS: 0.00 Hz  
 QT: 0.00 Hz  
 QU: 0.00 Hz  
 QV: 0.00 Hz  
 QW: 0.00 Hz  
 QX: 0.00 Hz  
 QY: 0.00 Hz  
 QZ: 0.00 Hz  
 RA: 0.00 Hz  
 RB: 0.00 Hz  
 RC: 0.00 Hz  
 RD: 0.00 Hz  
 RE: 0.00 Hz  
 RF: 0.00 Hz  
 RG: 0.00 Hz  
 RH: 0.00 Hz  
 RI: 0.00 Hz  
 RJ: 0.00 Hz  
 RK: 0.00 Hz  
 RL: 0.00 Hz  
 RM: 0.00 Hz  
 RN: 0.00 Hz  
 RO: 0.00 Hz  
 RP: 0.00 Hz  
 RQ: 0.00 Hz  
 RR: 0.00 Hz  
 RS: 0.00 Hz  
 RT: 0.00 Hz  
 RU: 0.00 Hz  
 RV: 0.00 Hz  
 RW: 0.00 Hz  
 RX: 0.00 Hz  
 RY: 0.00 Hz  
 RZ: 0.00 Hz  
 SA: 0.00 Hz  
 SB: 0.00 Hz  
 SC: 0.00 Hz  
 SD: 0.00 Hz  
 SE: 0.00 Hz  
 SF: 0.00 Hz  
 SG: 0.00 Hz  
 SH: 0.00 Hz  
 SI: 0.00 Hz  
 SJ: 0.00 Hz  
 SK: 0.00 Hz  
 SL: 0.00 Hz  
 SM: 0.00 Hz  
 SN: 0.00 Hz  
 SO: 0.00 Hz  
 SP: 0.00 Hz  
 SQ: 0.00 Hz  
 SR: 0.00 Hz  
 SS: 0.00 Hz  
 ST: 0.00 Hz  
 SU: 0.00 Hz  
 SV: 0.00 Hz  
 SW: 0.00 Hz  
 SX: 0.00 Hz  
 SY: 0.00 Hz  
 SZ: 0.00 Hz  
 TA: 0.00 Hz  
 TB: 0.00 Hz  
 TC: 0.00 Hz  
 TD: 0.00 Hz  
 TE: 0.00 Hz  
 TF: 0.00 Hz  
 TG: 0.00 Hz  
 TH: 0.00 Hz  
 TI: 0.00 Hz  
 TJ: 0.00 Hz  
 TK: 0.00 Hz  
 TL: 0.00 Hz  
 TM: 0.00 Hz  
 TN: 0.00 Hz  
 TO: 0.00 Hz  
 TP: 0.00 Hz  
 TQ: 0.00 Hz  
 TR: 0.00 Hz  
 TS: 0.00 Hz  
 TT: 0.00 Hz  
 TU: 0.00 Hz  
 TV: 0.00 Hz  
 TW: 0.00 Hz  
 TX: 0.00 Hz  
 TY: 0.00 Hz  
 TZ: 0.00 Hz  
 UA: 0.00 Hz  
 UB: 0.00 Hz  
 UC: 0.00 Hz  
 UD: 0.00 Hz  
 UE: 0.00 Hz  
 UF: 0.00 Hz  
 UG: 0.00 Hz  
 UH: 0.00 Hz  
 UI: 0.00 Hz  
 UJ: 0.00 Hz  
 UK: 0.00 Hz  
 UL: 0.00 Hz  
 UM: 0.00 Hz  
 UN: 0.00 Hz  
 UO: 0.00 Hz  
 UP: 0.00 Hz  
 UQ: 0.00 Hz  
 UR: 0.00 Hz  
 US: 0.00 Hz  
 UT: 0.00 Hz  
 UU: 0.00 Hz  
 UV: 0.00 Hz  
 UW: 0.00 Hz  
 UX: 0.00 Hz  
 UY: 0.00 Hz  
 UZ: 0.00 Hz  
 VA: 0.00 Hz  
 VB: 0.00 Hz  
 VC: 0.00 Hz  
 VD: 0.00 Hz  
 VE: 0.00 Hz  
 VF: 0.00 Hz  
 VG: 0.00 Hz  
 VH: 0.00 Hz  
 VI: 0.00 Hz  
 VJ: 0.00 Hz  
 VK: 0.00 Hz  
 VL: 0.00 Hz  
 VM: 0.00 Hz  
 VN: 0.00 Hz  
 VO: 0.00 Hz  
 VP: 0.00 Hz  
 VQ: 0.00 Hz  
 VR: 0.00 Hz  
 VS: 0.00 Hz  
 VT: 0.00 Hz  
 VU: 0.00 Hz  
 VV: 0.00 Hz  
 VW: 0.00 Hz  
 VX: 0.00 Hz  
 VY: 0.00 Hz  
 VZ: 0.00 Hz  
 WA: 0.00 Hz  
 WB: 0.00 Hz  
 WC: 0.00 Hz  
 WD: 0.00 Hz  
 WE: 0.00 Hz  
 WF: 0.00 Hz  
 WG: 0.00 Hz  
 WH: 0.00 Hz  
 WI: 0.00 Hz  
 WJ: 0.00 Hz  
 WK: 0.00 Hz  
 WL: 0.00 Hz  
 WM: 0.00 Hz  
 WN: 0.00 Hz  
 WO: 0.00 Hz  
 WP: 0.00 Hz  
 WQ: 0.00 Hz  
 WR: 0.00 Hz  
 WS: 0.00 Hz  
 WT: 0.00 Hz  
 WU: 0.00 Hz  
 WV: 0.00 Hz  
 WW: 0.00 Hz  
 WX: 0.00 Hz  
 WY: 0.00 Hz  
 WZ: 0.00 Hz  
 XA: 0.00 Hz  
 XB: 0.00 Hz  
 XC: 0.00 Hz  
 XD: 0.00 Hz  
 XE: 0.00 Hz  
 XF: 0.00 Hz  
 XG: 0.00 Hz  
 XH: 0.00 Hz  
 XI: 0.00 Hz  
 XJ: 0.00 Hz  
 XK: 0.00 Hz  
 XL: 0.00 Hz  
 XM: 0.00 Hz  
 XN: 0.00 Hz  
 XO: 0.00 Hz  
 XP: 0.00 Hz  
 XQ: 0.00 Hz  
 XR: 0.00 Hz  
 XS: 0.00 Hz  
 XT: 0.00 Hz  
 XU: 0.00 Hz  
 XV: 0.00 Hz  
 XW: 0.00 Hz  
 XX: 0.00 Hz  
 XY: 0.00 Hz  
 XZ: 0.00 Hz  
 YA: 0.00 Hz  
 YB: 0.00 Hz  
 YC: 0.00 Hz  
 YD: 0.00 Hz  
 YE: 0.00 Hz  
 YF: 0.00 Hz  
 YG: 0.00 Hz  
 YH: 0.00 Hz  
 YI: 0.00 Hz  
 YJ: 0.00 Hz  
 YK: 0.00 Hz  
 YL: 0.00 Hz  
 YM: 0.00 Hz  
 YN: 0.00 Hz  
 YO: 0.00 Hz  
 YP: 0.00 Hz  
 YQ: 0.00 Hz  
 YR: 0.00 Hz  
 YS: 0.00 Hz  
 YT: 0.00 Hz  
 YU: 0.00 Hz  
 YV: 0.00 Hz  
 YW: 0.00 Hz  
 YX: 0.00 Hz  
 YY: 0.00 Hz  
 YZ: 0.00 Hz  
 ZA: 0.00 Hz  
 ZB: 0.00 Hz  
 ZC: 0.00 Hz  
 ZD: 0.00 Hz  
 ZE: 0.00 Hz  
 ZF: 0.00 Hz  
 ZG: 0.00 Hz  
 ZH: 0.00 Hz  
 ZI: 0.00 Hz  
 ZJ: 0.00 Hz  
 ZK: 0.00 Hz  
 ZL: 0.00 Hz  
 ZM: 0.00 Hz  
 ZN: 0.00 Hz  
 ZO: 0.00 Hz  
 ZP: 0.00 Hz  
 ZQ: 0.00 Hz  
 ZR: 0.00 Hz  
 ZS: 0.00 Hz  
 ZT: 0.00 Hz  
 ZU: 0.00 Hz  
 ZV: 0.00 Hz  
 ZW: 0.00 Hz  
 ZX: 0.00 Hz  
 ZY: 0.00 Hz  
 ZZ: 0.00 Hz

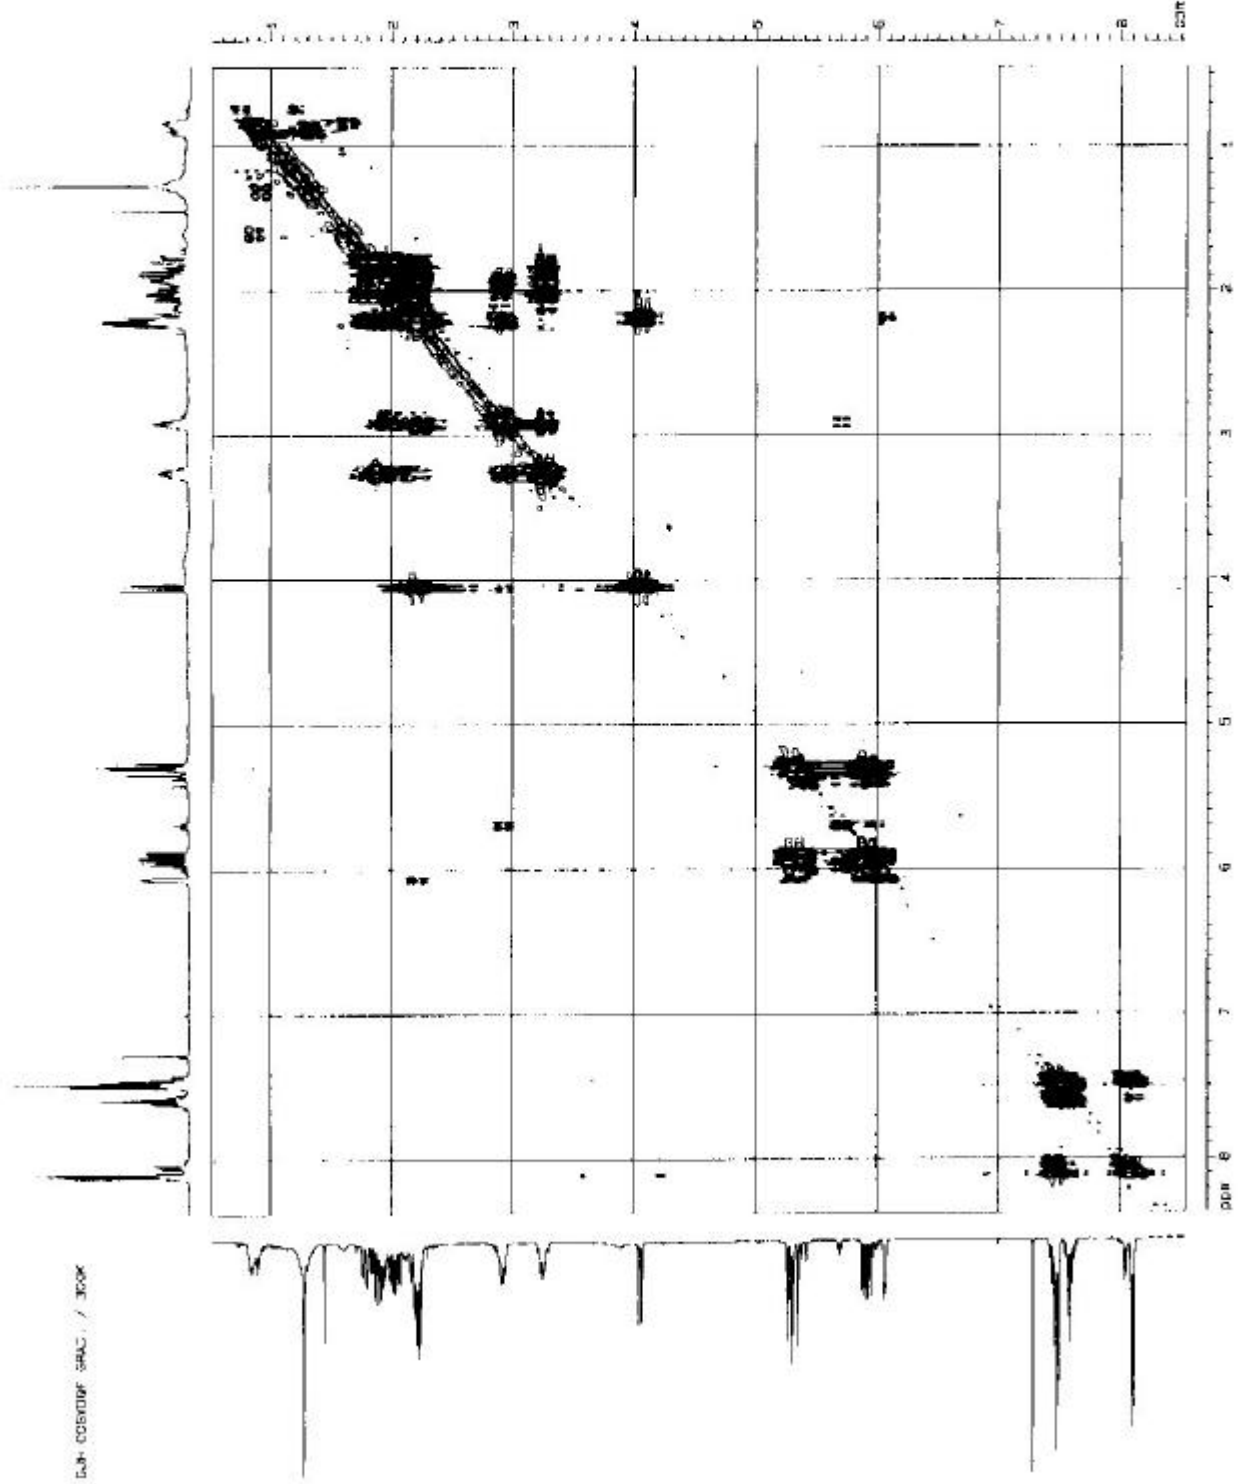

500 COSY OF GRAC / 300K

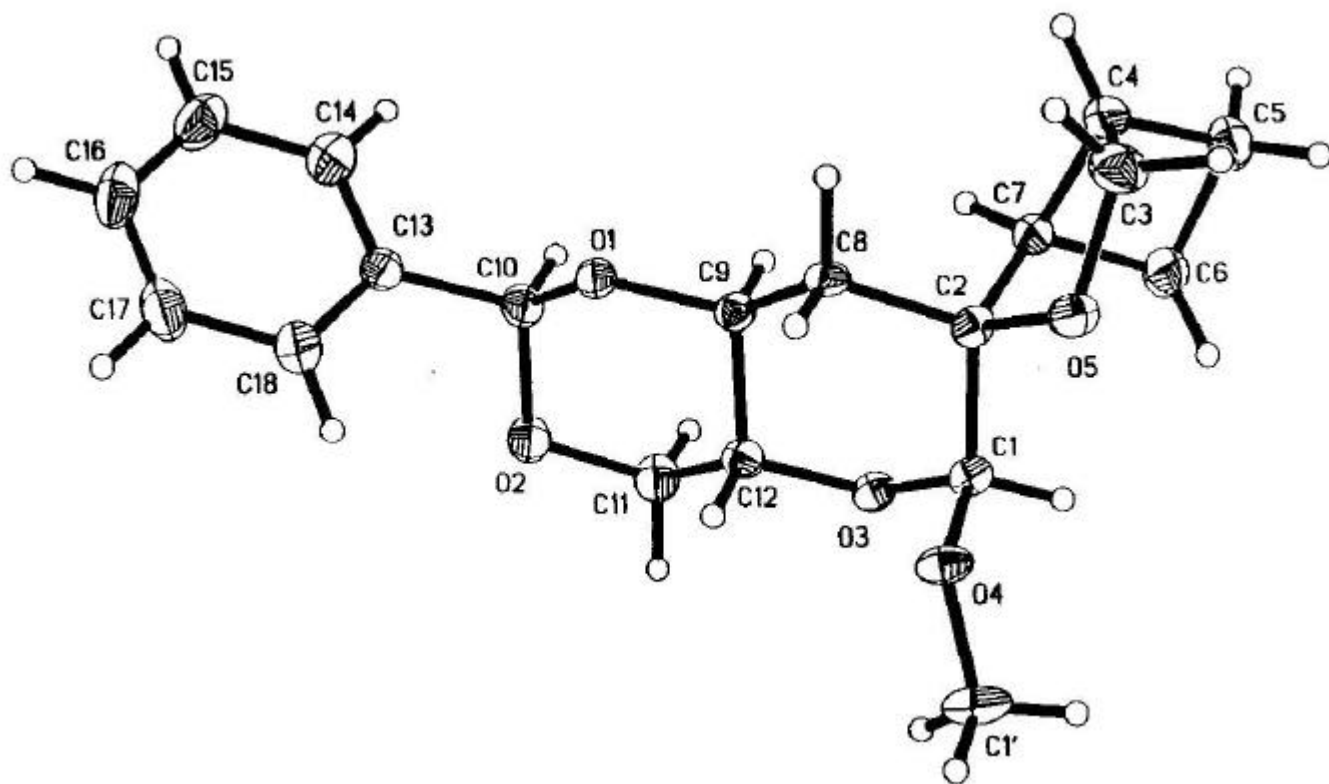

**18a**, X-ray crystal structure – for full details see Ref. 15

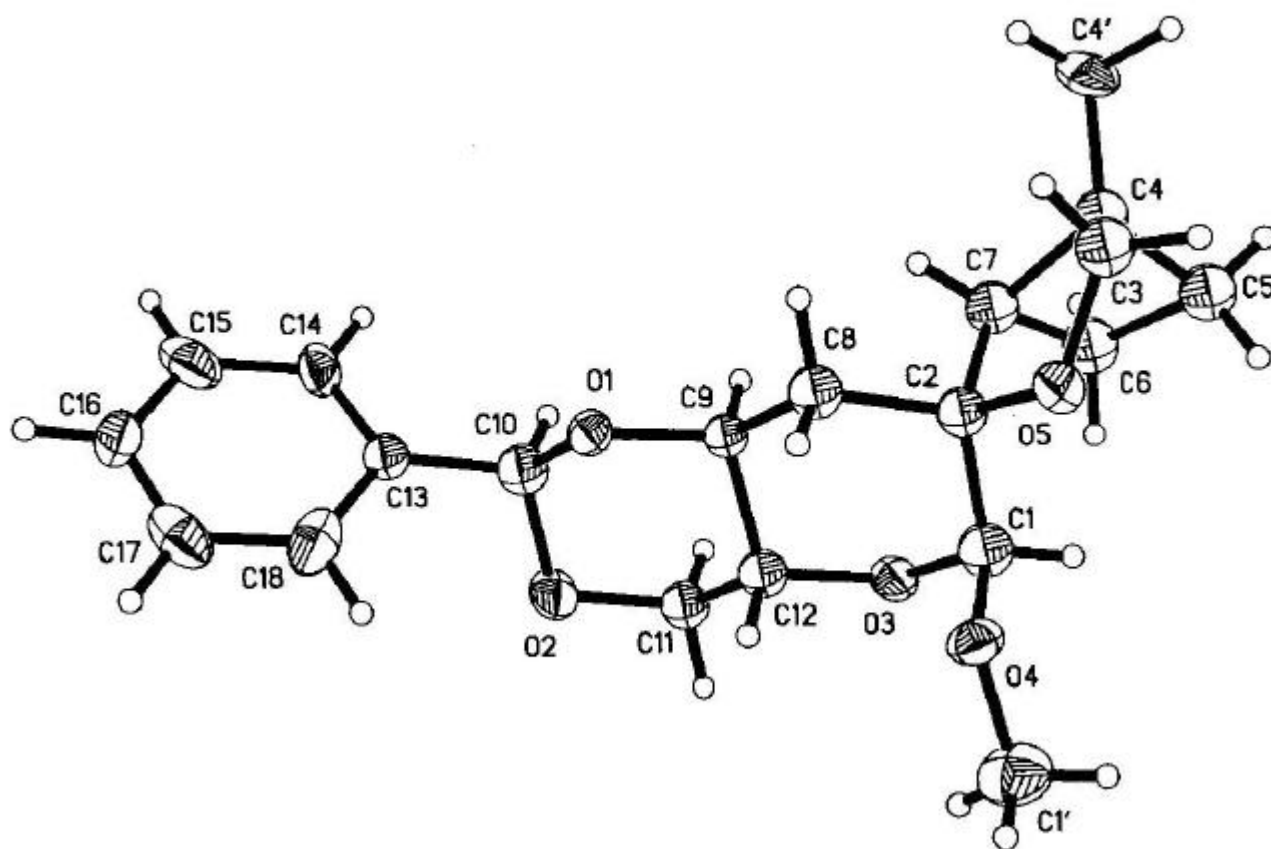

**18b**, X-ray crystal structure – for full details see Ref. 15
